# Supplementary material
Source: PubMed Central journal article supplement (PMC8715251)
Supplement: mmc1.pdf [file mmc1.pdf]

**Biophysical Journal, Volume 120**

**Supplemental information**

**Modeling coronavirus spike protein dynamics: implications for immunogenicity and immune escape**

**Genevieve Kunkel, Mohammad Madani, Simon J. White, Paulo H. Verardi, and Anna Tarakanova**

## Supplementary Information

# Modeling Coronavirus Spike Protein Dynamics: Implications for Immunogenicity and Immune Escape

G. Kunkel<sup>1</sup>, M. Madani<sup>1</sup>, S. J. White<sup>2</sup>, P. H. Verardi<sup>3</sup>, A. Tarakanova<sup>1,4\*</sup>

1. Department of Mechanical Engineering, University of Connecticut, Storrs, CT, USA

2. Department of Molecular and Cell Biology, University of Connecticut, Storrs, CT, USA

3. Department of Pathobiology and Veterinary Science, University of Connecticut, Storrs, CT, USA

4. Department of Biomedical Engineering, University of Connecticut, Storrs, CT, USA

\* Corresponding author: [anna.tarakanova@uconn.edu](mailto:anna.tarakanova@uconn.edu)

### 1. SARS-CoV-2 Protein Sequences

\*Mutations are in yellow

\*\* Spike protein names correspond to what is listed in the literature through experimental studies or by database identifier. If no name exists, then the spike protein mutant is assigned a name. For proteins that are assigned a name, the naming conventions of its associated experimental study are used. If this information is not listed, then different families of mutations are separated by a period and mutation is assigned a numerical identifier. For example, the 6VXX SARS-CoV-2 mutant sequence contains a signal peptide and trimerization motif, thus its name convention is SC2.S1.TM1. Should another spike protein have the same, for example, trimerization motif mutation, it will also have the “.TM1” identifier. Similar families of mutations include dashes.

#### Uniport P0DTC2 (Wild Type Sequence)

MFVFLVLLPLVSSQCVNLTRTQLPPAYTNSFTRGVYYPDKVFRSSVLHSTQDLFLPFFSNVTWFHAIHVSG  
TNGTKRFDNPVLPFNDGVYFASTEKSNIIRGWIFGTTLDLSDKTSLLIVNNAATNVIKVCDFQFCNDPFLGVY  
YHKNKNSWMESEFRVYSSANNCTFEYVSQPFLMDLEGKQGNFKNLREFVFKNIDGYFKIYSKHTPINLVRD  
LPQGFSALEPLVDLPIGINITRFQTLALHRSYLTGPDSSSGWTAGAAAYYVGYLQPRFTLLKYNENGTITD  
AVDCALDPLSEKCTLSFTVEKGIYQTSNFRVQPTESIVRFPNITNLCDFGEVFNATRFASVYAWNRKRISN  
CVADYSVLYNSASFSTFKCYGVSPTKLNDLCFTNVYADSFVIRGDEVRQIAPGQTGKIADYNYKLPDDFTG  
CVIAWNSNNLDSKVGGNYNLYRLFRKSNLKPFRDISTEIQAGSTPCNGVEGFNCFYPLQSYGFQPTNG  
VGYQPYRVVVLSEFLLHAPATVCGPKKSTNLVKNKCVNFNFNGLTGTGVLTESNKKFLPFQFGRDIADTT  
DAVRDPQTLEILDITPCSFSGVSVITPGTNTSNQVAVLYQDVNCTEVPVAIHADQLTPTWRVYSTGNSVFT  
RAGCLIGAEHVNSYECDIPIGAGICASYQTQTNPRRARSVASQSIIAYTMSLGAENSVAYSNNIAIPTNFT  
ISVTTEILPVSMTKTSVDCTMYICGDSTECNLLLQYGSFCTQLNRALTGIAVEQDKNTQEVFAQVKQIYKT  
PPIKDFGGFNFSQILPDPSKPSKRSFIEDLLFNKVTLADAGFIKQYGDCLGDIAARDLCAQKFNGLTVLPLL  
TDEMIAQYTSALLAGTITSGWTFGAGAALQIPFAMQMA YRFNGIGVTQNVLYENQKLIANQFN SAIGKIQD  
SLSSTASALGKLQDVVNQNAQALNTLVKQLSSNFGAISSVLNDILSRDLKVEAEVQIDRLITGRLQSLQTYV  
TQQLIRAAEIRASANLAATKMSECVLGGQSKRVDFCGKGYHLMSPQSAPHGVVFLHVTVVPAQEKNFSTA  
PAICHGDKAHFPREGVVFVSNQTHWFVTQRNFYEPQIITDNTFVSGNCDVVIGIVNNTVYDPLQPELDSFKE  
ELDKYFKNHTSPDVLGDISGINASVNNIQKEIDRLNEVAKNLNESLIDLQELGKYEQYIKWPWYIWLGFIA  
GLIAIVMVTIMLCCMTSCCCLKGCSCGSCCKFDEDDSEPVLKGVKLLHYT

Name: BiPro

PDB: 6VSB (2)

MFVFLVLLPLVSSQCVNLTRTQLPPAYTNSFTRGVYYPDKVFRSSVLHSTQDLFLPFFSNVTWFHAIHVSG  
TNGTKRFDNPVLPFNDGVYFASTEKSNIIRGWIFGTTLDLSDKTSLLIVNNAATNVIKVCDFQFCNDPFLGVY

YHKNNKSWMESEFRVYSSANNCTFEYVSQPFLMDLEGKQGNFKNLREFVFKNIDGYFKIYSKHTPINLVRD  
LPQGFSALEPLVDLPIGINITRFQTLALHRSYLTGDDSSSGWTAGAAAYYVGYLQPRTFLLKYNENGTITD  
AVDCALDPLSEKCTLSFTVEKGIYQTSNFRVQPTESIVRFPNITNLCPFGEVFNATRFASVYAWNRKRISN  
CVADYSVLYNSASFSTFKCYGVSPTKLNLDLFCFTNVYADSFVIRGDEVQRQIAPGQTGKIADYNYKLPDDFTG  
CVIAWNSNNLDSKVGGNYNLYRLFRKSNLKPFRDISTEYIYQAGSTPCNGVEGFNCYFPLQSYGFQPTNG  
VGYQPYRVVLSFELLHAPATVCGPKKSTNLVKNKCVNFNGLTGTGVLTESNKKFLPFQFGRDIADTT  
DAVRDPQTEILDITPCFSGGVSVITPGTNTSNQVAVLYQDVNCTEVPVAIHADQLTPTWRVYSTGNSVFQT  
RAGCLIGAEHVNSYECDIPIGAGICASYQTQTNSPGSASVSVASQSIAYTMSLGAENSVAYSNNNSIAIPTNFT  
ISVTTEILPVSMTKTSVDCTMYICGDSSTECNSNLLQYGSFCTQLNRALTGIAVEQDKNTQEVFAQVKQIYKT  
PPIKDFGGFNFSQILPDPSPKPSKRSFIEDLLFNKVTADAGFIKQYGDCLGDIAARDLCAQKFNGLTVLPPLL  
TDEMIAQYTSALLAGTITSGWTFGAGAAALQIPFAMQMA YRFNGIGVTONVLYENQKLIANQFNSAIGKIQD  
SLSSTASALGKLQDVVNQNAQALNTLVKQLSSNFGAISSVLNDILSRLDPEAEVQIDRLITGRLQSLQTYVT  
QQLIRAAEIRASANLAATKMSECVLGGSKRVDFCGKGYHLMSPQSAPHGVVFLHVTVYVPAQEKNFTTAP  
AICHGKAHFPREGVVFVSNGTHWFVTQRNFYEQIITDNTFVSGNCDVVIGIVNNTVYDPLQPELDSFKEE  
LDKYFNHTSPDVLGDISGINASVVNIQKEIDRLNEVAKNLNESLIDLQELGKYEQGSGYIPEAPRDGQAY  
VRKDG EWVLLSTFLGRSLEVLFGQPGHHHHHHHSAWSHPQFEKGGGSGGGSGGSAWSHPQFEK

Unresolved: 1-26, 67-78, 96-98, 143-155,177-186, 247-260, 330-334, 444-490, 501-502, 621-640, 673-686, 812-814, 829-850, 1147-1288

**Name:** HexaPro

**PDB:** 6XKL (3)

MFVFLVLLPLVSSQCVNLTRTQLPPAYTNSFTRGVYYPDKVFRSSVLHSTQDLFLPFFSNVTWFHAIHVSG  
TNGTKRFDNPVLPFNDGVYFASTEKSNIIRGWIFGTTLDLSDKTSLLIVNNAATNVVIKVCDFQFCNDPFLGVY  
YHKNNKSWMESEFRVYSSANNCTFEYVSQPFLMDLEGKQGNFKNLREFVFKNIDGYFKIYSKHTPINLVRD  
LPQGFSALEPLVDLPIGINITRFQTLALHRSYLTGDDSSSGWTAGAAAYYVGYLQPRTFLLKYNENGTITD  
AVDCALDPLSEKCTLSFTVEKGIYQTSNFRVQPTESIVRFPNITNLCPFGEVFNATRFASVYAWNRKRISN  
CVADYSVLYNSASFSTFKCYGVSPTKLNLDLFCFTNVYADSFVIRGDEVQRQIAPGQTGKIADYNYKLPDDFTG  
CVIAWNSNNLDSKVGGNYNLYRLFRKSNLKPFRDISTEYIYQAGSTPCNGVEGFNCYFPLQSYGFQPTNG  
VGYQPYRVVLSFELLHAPATVCGPKKSTNLVKNKCVNFNGLTGTGVLTESNKKFLPFQFGRDIADTT  
DAVRDPQTEILDITPCFSGGVSVITPGTNTSNQVAVLYQDVNCTEVPVAIHADQLTPTWRVYSTGNSVFQT  
RAGCLIGAEHVNSYECDIPIGAGICASYQTQTNSPGSASVSVASQSIAYTMSLGAENSVAYSNNNSIAIPTNFT  
ISVTTEILPVSMTKTSVDCTMYICGDSSTECNSNLLQYGSFCTQLNRALTGIAVEQDKNTQEVFAQVKQIYKT  
PPIKDFGGFNFSQILPDPSPKPSKRSPIEDLLFNKVTADAGFIKQYGDCLGDIAARDLCAQKFNGLTVLPPLL  
TDEMIAQYTSALLAGTITSGWTFGAGPALQIPPMQMA YRFNGIGVTONVLYENQKLIANQFNSAIGKIQDS  
LSSTPSALGKLQDVVNQNAQALNTLVKQLSSNFGAISSVLNDILSRLDPEAEVQIDRLITGRLQSLQTYVTQ  
QLIRAAEIRASANLAATKMSECVLGGSKRVDFCGKGYHLMSPQSAPHGVVFLHVTVYVPAQEKNFTTAPAI  
CHDGKAHFPREGVVFVSNGTHWFVTQRNFYEQIITDNTFVSGNCDVVIGIVNNTVYDPLQPELDSFKEELD  
KYFNHTSPDVLGDISGINASVVNIQKEIDRLNEVAKNLNESLIDLQELGKYEQGSGYIPEAPRDGQAYVR  
KDG EWVLLSTFLGRSLEVLFGQPGHHHHHHHSAWSHPQFEKGGGSGGGSGGSAWSHPQFEK

Unresolved: 1-26, 67-78, 96-98, 143-155,177-186, 247-260, 330-334, 444-490, 501-502, 621-640, 673-686, 812-814, 829-850, 1147-1288

**Name:** BiPro-1

**PDB:** 6Z97 (4)

MFVFLVLLPLVSSQCVNLTRTQLPPAYTNSFTRGVYYPDKVFRSSVLHSTQDLFLPFFSNVTWFHAIHVSG  
TNGTKRFDNPVLPFNDGVYFASTEKSNIIRGWIFGTTLDLSDKTSLLIVNNAATNVVIKVCDFQFCNDPFLGVY  
YHKNNKSWMESEFRVYSSANNCTFEYVSQPFLMDLEGKQGNFKNLREFVFKNIDGYFKIYSKHTPINLVRD  
LPQGFSALEPLVDLPIGINITRFQTLALHRSYLTGDDSSSGWTAGAAAYYVGYLQPRTFLLKYNENGTITD  
AVDCALDPLSEKCTLSFTVEKGIYQTSNFRVQPTESIVRFPNITNLCPFGEVFNATRFASVYAWNRKRISN  
CVADYSVLYNSASFSTFKCYGVSPTKLNLDLFCFTNVYADSFVIRGDEVQRQIAPGQTGKIADYNYKLPDDFTG  
CVIAWNSNNLDSKVGGNYNLYRLFRKSNLKPFRDISTEYIYQAGSTPCNGVEGFNCYFPLQSYGFQPTNG  
VGYQPYRVVLSFELLHAPATVCGPKKSTNLVKNKCVNFNGLTGTGVLTESNKKFLPFQFGRDIADTT  
DAVRDPQTEILDITPCFSGGVSVITPGTNTSNQVAVLYQDVNCTEVPVAIHADQLTPTWRVYSTGNSVFQT  
RAGCLIGAEHVNSYECDIPIGAGICASYQTQTNSPGSASVSVASQSIAYTMSLGAENSVAYSNNNSIAIPTNFT

ISVTTEILPVSMTKTSVDCTMYICGDSTECSNLLLQYGSFCTQLNRALTGIAVEQDKNTQEVFAQVKQIYKT  
PPIKDFGGFNFSQILPDPSPKSKRSFIEDLLFNKVTLADAGFIKQYGDCLGDIAARDLCAQKFNGLTVLPPLL  
TDEMIAQYTSALLAGTITSGWTFGAGAALQIPFAMQMAYRFNGIGVTQNVLYENQKLIANQFNSAIGKIQD  
SLSSTASALGKLQDVVNQNAQALNTLVKQLSSNFGAISSVLNDILSRLD **PP**EAEVQIDRLITGRLQSLQTYVT  
QQLIRAAEIRASANLAATKMSECVLGQSKRVDFCGKGYHLMSFPQSAPHGVVFLHVTVYVPAQEKNFHTTAP  
AICHGDKAHFPREGV FVSNGTHWFVTQRNFYEPQIITDNTFVSGNCDVVIGVNNTVYDPLQPELDSFKEE  
LDKYFKNHTSPDVLDGDISGINASVVNIQKEIDRLNEVAKNLNESLIDLQELGKYEQ **GSGYIPEAPRDGQAY**  
**VRKDG EWVLLSTFLGRSLEVL FQGP GHHHHHHHGS A WSH PQFEKGGGSGGSGGSA WSH PQFEK**

Unresolved: 1-26, 70-81,114-115, 144-187, 243-262, 621-640, 677-689, 828-850, 1148-1288

**Name:** SC2.S1.TM1

**PDB:** 6VYB & 6VXX (5)

**M****GILPSPGMPALLSLVSLLSVLLMGCVAETGT**QCVNLTTRTQLPPAYTNSFTRGVYYPDKVFRSSVLHSTQ  
DLFLPFFSNVTWFHAIHVSGTNGTKRFDNPVLPFNDGVYFASTEKSNIIRGWIFGTTLD SKTQSL LIVN NATN  
VVIKVCEFQFCNDPFLGVYYHKNNKSWMESEFRVYSSANNCTFEYVSQPFLMDLEGKQGNFKNLREFVFK  
NIDGYFKIYSKHTPINLVRDLPQGFSALEPLVDLPIGINITRFQTLALHRSYLT PGDSSSGWTAGAAA YVVG  
YLQPRTFLLKYNENGTITDAVDCALDPLSETKCTLKSFTVEKGIYQTSNFRVQPTESIVRFPNITNLCPFGEVF  
NATRFASVYAWNRKRISNCVADYSVLYNSASFSTFKCYGVSPTKLNDLCFTNVYADSFVIRGDEV RQIAPG  
QTGKIADYNYKLPDDFTGCVIAWNSNNDLSKVGGNYNLYR LFRKSNLKPFERDISTEYIYQAGSTPCNGVE  
GFNCYFPLQSYGFQPTNGVGYQPYRVVLSFELLHAPATVCGPKKSTNLVKNKCVNFNGLTGTGVLTE  
SNKKFLPFQQFGRDIADTTDAVRDPQTLEILDITPCSFGGVSVITPGTNTSNEVAVLYQDVNCTEVPVAIHAD  
QLTPTWRVYSTGSNV FQTRAGCLIGAEHVNNSYECDIPIGAGICASYQTQTNSPS **GAGS**VASQSIIAYTMSL  
GAENSVAYSNNIAIPTNFTISVTTEILPVSMTKTSVDCTMYICGDSTECSNLLLQYGSFCTQLNRALTGIAVE  
QDKNTQEVFAQVKQIYKTPPIKDFGGFNFSQILPDPSPKSKRSFIEDLLFNKVTLADAGFIKQYGDCLGDIAA  
RDLICAQKFNGLTVLPPLLTDEMIAQYTSALLAGTITSGWTFGAGAALQIPFAMQMAYRFNGIGVTQNVLY  
ENQKLIANQFN SAIGKIQDSLSSTASALGKLQDVVNQNAQALNTLVKQLSSNFGAISSVLNDILSRLD **PP**EAE  
VQIDRLITGRLQSLQTYVTQQLIRAAEIRASANLAATKMSECVLGQSKRVDFCGKGYHLMSFPQSAPHGVV  
FLHVTVYVPAQEKNFHTTAPAICHGDKAHFPREGV FVSNGTHWFVTQRNFYEPQIITDNTFVSGNCDVVIGV  
NNTVYDPLQPELDSFKEELDKYFKNHTSPDVLDGDISGINASVVNIQKEIDRLNEVAKNLNESLIDLQELGK  
YEQYIK **GSGRENLYFQGGGGSGYIPEAPRDGQAYVRKDG EWVLLSTFLGHHHHHHH**

Unresolved: 1-26, 70-81, 114-115, 144-185, 243-262, 443-489, 502, 621-640, 677-689, 812, 828-854, 1148-1281

**Name:** SC2.S2. TM1-1

**PDB:** 6ZGG (6)

**M****GILPSPGMPALLSLVSLLSVLLMGCVAETGM**FVFLVLLPLVSSQCVNLTTRTQLPPAYTNSFTRGVYYPD  
KVFRSSVLHSTQDLFLPFFSNVTWFHAIHVSGTNGTKRFDNPVLPFNDGVYFASTEKSNIIRGWIFGTTLD SK  
TQSL LIVN NATN VVIK VCEFQFCNDPFLGVYYHKNNKSWMESEFRVYSSANNCTFEYVSQPFLMDLEGKQ  
GNFKNLREFVFKNIDGYFKIYSKHTPINLVRDLPQGFSALEPLVDLPIGINITRFQTLALHRSYLT PGDSSSG  
WTAGAAA YVVG YLQPRTFLLKYNENGTITDAVDCALDPLSETKCTLKSFTVEKGIYQTSNFRVQPTESIVR  
FPNITNLCPFGEVF NATRFASVYAWNRKRISNCVADYSVLYNSASFSTFKCYGVSPTKLNDLCFTNVYADSF  
VIRGDEV RQIAPGQTGKIADYNYKLPDDFTGCVIAWNSNNDLSKVGGNYNLYR LFRKSNLKPFERDISTEYI  
YQAGSTPCNGVEGFNCYFPLQSYGFQPTNGVGYQPYRVVLSFELLHAPATVCGPKKSTNLVKNKCVNFN  
FNGLTGTGVLTESNKKFLPFQQFGRDIADTTDAVRDPQTLEILDITPCSFGGVSVITPGTNTSNQVAVLYQD  
VNCTEVPVAIHADQLTPTWRVYSTGSNV FQTRAGCLIGAEHVNNSYECDIPIGAGICASYQTQTNSPRRARS  
VASQSIIAYTMSLGAENSVAYSNNIAIPTNFTISVTTEILPVSMTKTSVDCTMYICGDSTECSNLLLQYGSFC  
TQLNRALTGIAVEQDKNTQEVFAQVKQIYKTPPIKDFGGFNFSQILPDPSPKSKRSFIEDLLFNKVTLADAGFI  
KQYGDCLGDIAARDLCAQKFNGLTVLPPLLTDEMIAQYTSALLAGTITSGWTFGAGAALQIPFAMQMAYR  
FNGIGVTQNVLYENQKLIANQFN SAIGKIQDSLSSTASALGKLQDVVNQNAQALNTLVKQLSSNFGAISSVL  
NDILSRLD **PP**EAEVQIDRLITGRLQSLQTYVTQQLIRAAEIRASANLAATKMSECVLGQSKRVDFCGKGYHL  
MSFPQSAPHGVVFLHVTVYVPAQEKNFHTTAPAICHGDKAHFPREGV FVSNGTHWFVTQRNFYEPQIITDNT  
FVSGNCDVVIGVNNTVYDPLQPELDSFKEELDKYFKNHTSPDVLDGDISGINASVVNIQKEIDRLNEVAKN  
L NESLIDLQELGKYEQ **SGRENLYFQGGGGSGYIPEAPRDGQAYVRKDG EWVLLSTFLGHHHHHHH**

Unresolved: 1-13, 71-75, 618-640, 677-688, 828-848, 941-943, 1147-1287

**Name:** SC2.N1.C1.2P.TM2

**PDB:** 6XF6 (7)

GPQCVNLTRRTQLPPAYTNSFTRGVYYPDKVFRSSVLHSTQDLFLPFFSNVTWFHAIHVSGTNGTKRFDNP  
VLPFNDGVYFASTEKSNIIRGWIFGTTLDSTQSLNATNVVIVKVECFQFCNDPFLGVYHKNKNSWM  
ESEFRVYSSANNCTFEYVSQPFLMDLEGKQGNFKNREFVFKNIDGYFKIYSKHTPINLVRDLPQGFSALEP  
LVDLPIGINITRFQTLALHRSYLTGPDSSSGWTAGAAAYYVGYLQPRFTLLKYNENGTITDAVDCALDPLS  
ETKCTLKSFTVEKGIYQTSNFRVQPTESIVRFPNITNLCPFGEVFNATRFASVYAWNRKRISNCVADYSVLY  
NSASFSTFKCYGVSPKLNLDLFCFTNVYADSFVIRGDEVRQIAPGQTGKIADYNYKLPDDFTGCVIAWNSNN  
LDSKVGGNYNLYRFLFRKSNLKPFERDISTEIQAGSTPCNGVEGFNCYFPLQSYGFQPTNGVGYQPYRVV  
VLSFELLHAPATVCGPKKSTNLVKNKCVNFNFNGLTGTGVLTESNKKFLPFQFGRDIADTTDAVRDPQTL  
EILDITPCSFSGGVSVITPGTNTSNQVAVLYQDVNCTEVPVAIHADQLTPTWRVYSTGNSVFNQTRAGCLIGAE  
HVNNSYECDIPIGAGICASYQTQTNPSGSASVSVASQSIAYTMSLGAENSVAYSNNNSIAIPTNFTISVTTEILPV  
SMTKTSVDCTMYICGDSTECNLLLQYGSFCTQLNRALTGIAVEQDKNTQEVFAQVKQIYKTPPIKDFGGF  
NFSQILPDPSPKPSKRSFIEDLLFNKVTLADAGFIKQYGDCLGDIAARDLCAQKFNGLTVLPPLLDEMIAQY  
TSALLAGTITSGWTFGAGAALQIPFAMQMAYRFNGIGVTVQNVLYENQKLIANQFNNSAIGKIQDSLSTASAL  
GKLQDVVNQNAQALNTLVKQLSSNFGAISSVNDILSRLDPEAEVQIDRLITGRLQSLQTYVTQQLIRAAEI  
RASANLAATKMSECVLQSKRVDFCGKGYHLSMFPQSAPHGVVFLHVTVYVPAQEKNTTAPAICHDKGA  
HFPREGVFSNGTHWFVTQRNFYEPQIITDNTFVSGNCDVVIGVNNTVYDPLQPELDSFKEELDKYFKNH  
TSPDVLGDISGINASVVNIQKEIDRLNEVAKNLNESLIDLQELGKYEQGSGYIPEAPRDGQAYVRKDGW  
VLLSTFLGRSGGLVPQQSGGLNDIFEAQKIEWHEG

Unresolved: 12-26, 70-81, 114-115, 144-165, 173-185, 243-262, 621-640, 677-690, 828-854, 1148-1266

**Name:** SC2.C2. 1P. TM3

**PDB:** 7AD1 (8)

MFVFLVLLPLVSSQCVNLTRRTQLPPAYTNSFTRGVYYPDKVFRSSVLHSTQDLFLPFFSNVTWFHAIHVSG  
TNGTKRFDNPVLPFNDGVYFASTEKSNIIRGWIFGTTLDSTQSLNATNVVIVKVECFQFCNDPFLGVY  
YHKNKNSWMESEFRVYSSANNCTFEYVSQPFLMDLEGKQGNFKNREFVFKNIDGYFKIYSKHTPINLVRD  
LPQGFSALEPLVDLPIGINITRFQTLALHRSYLTGPDSSSGWTAGAAAYYVGYLQPRFTLLKYNENGTITD  
AVDCALDPLSETKCTLKSFTVEKGIYQTSNFRVQPTESIVRFPNITNLCPFGEVFNATRFASVYAWNRKRISN  
CVADYSVLYNSASFSTFKCYGVSPKLNLDLFCFTNVYADSFVIRGDEVRQIAPGQTGKIADYNYKLPDDFTG  
CVIAWNSNNLDSKVGGNYNLYRFLFRKSNLKPFERDISTEIQAGSTPCNGVEGFNCYFPLQSYGFQPTNG  
VGYQPYRVVLSFELLHAPATVCGPKKSTNLVKNKCVNFNFNGLTGTGVLTESNKKFLPFQFGRDIADTT  
DAVRDPQTLLEILDITPCSFSGGVSVITPGTNTSNQVAVLYQNVNCTEVPVAIHADQLTPTWRVYSTGNSVFNQ  
RAGCLIGAEHVNNSYECDIPIGAGICASYQTQTNPSRAGSVSVASQSIAYTMSLGAENSVAYSNNNSIAIPTNFT  
ISVTTEILPVSMKTSVDCTMYICGDSTECNLLLQYGSFCTQLNRALTGIAVEQDKNTQEVFAQVKQIYKT  
PPIKDFGGFNFSQILPDPSPKPSKRSFIEDLLFNKVTLADAGFIKQYGDCLGDIAARDLCAQKFNGLTVLPPLL  
DEMIAQYTSALLAGTITSGWTFGAGPALQIPFAMQMAYRFNGIGVTVQNVLYENQKLIANQFNNSAIGKIQD  
SLSSTPSALGKLQDVVNQNAQALNTLVKQLSSNFGAISSVNDILSRLDKPEAEVQIDRLITGRLQSLQTYVT  
QQLIRAAEIIRASANLAATKMSECVLQSKRVDFCGKGYHLSMFPQSAPHGVVFLHVTVYVPAQEKNTTAP  
AICHDKGAHFPREGVFSNGTHWFVTQRNFYEPQIITDNTFVSGNCDVVIGVNNTVYDPLQPELDSFKEE  
LDKYFKNHTSPDVLGDISGINASVVNIQKEIDRLNEVAKNLNESLIDLQELGKYEQGSGYIPEAPRDGQAY  
VRKDGWVLLSTFLGRSLEVLFPQPGSLPETGGGSDYKDDDDKGGGGSGGGGGSGGGGGSGGGGGSGGGGGSH  
HHHHH

Unresolved: 1-26, 70-87, 114-115, 132-165, 173-185, 243-262, 443-448, 477-489, 502-503, 621-640, 677-689, 812,  
828-854, 1148-1297

**Name:** u1S2q

**PDB:** 6X2B (9)

VNLTRRTQLPPAYTNSFTRGVYYPDKVFRSSVLHSTQDLFLPFFSNVTWFHAIHVSGTNGTKRFDNPVLPFN  
DGVYFASTEKSNIIRGWIFGTTLDSTQSLNATNVVIVKVECFQFCNDPFLGVYHKNKNSWMESEFR  
VYSSANNCTFEYVSQPFLMDLEGKQGNFKNREFVFKNIDGYFKIYSKHTPINLVRDLPQGFSALEPLVDLPI  
GINITRFQTLALHRSYLTGPDSSSGWTAGAAAYYVGYLQPRFTLLKYNENGTITDAVDCALDPLSETKCTL  
KSFTVEKGIYQTSNFRVQPTESIVRFPNITNLCPFGEVFNATRFASVYAWNRKRISNCVADYSVLYNSASFST

FKCYGVSPTKLNLDLCTNVYADSFVIRGDEVQRQIAPGQTGKIADYNYKLPDDFTGCVIAWNSNNLDSKVG  
GNYNYLYRLFRKSNLKPFRDISTEIQAGSTPCNGVEGFNCYFPLQSYGFQPTNGVGYQPYRVVLSFELL  
HAPATVCGPKKSTNLVKNKCVNFNFNGLTGTGVLTESNKKFLPFQQFGRDILDITDAVRDPQTLEILDITPC  
SFGGVSVITPGTNTSNEVAVLYQDVNCTEVPVAIHADQLTPTWRVYSTGSNVFQTRAGCLIGAEHVNNSYE  
CDIPIGAGICASYQTQTNSPGSASSVASQSIIAYTMSLGAENSVAYSNNNSIAIPTNFTISVTTEILPVSMTKTSV  
DCTMYICGDSTECNLLLQYGSFCTQLNRALTGIAVEQDKNTQEVFAQVKQIYKTPPIKDFGGFNFSQILPD  
PSKPSKRSFIEDLLFNKVTLADAGFIKQYGDCLGDIAARDLICAQKYIGLTVLPPLLDEMIAQYTSALLAGT  
ITSGWTFGAGAALQIPFAMQMA YRFNGIGVTQNVLYENQKLIANQFN SAIGKIQDLSSTASALGKLQDVV  
NQNAQALNTLVKQLSSNF GAISSVLNDILSRDPEAEVQIDRLITGRLQSLQTYVTQQLIRAAEIRASANLA  
ATKMSECVLGQSKRVDFCGKGYHLSFPQSAPHGVVFLHVTVYVPAQEKNTTAPAICHGDKAHFPREGVF  
VSNGTHWFVTQRNFYEPQIITDNTFVSGNCDVVIGIVNNTVYDPLQPELDSFKEELDKYFKNHTSPDVLDG  
DISGINASVVNIQKEIDRLNEVAKNLNESLIDLQELGKYEQGSGYIPEAPRDGQAYVRKDG EWVLLSTFLGR  
SLEVLFOGPGHHHHHHHSAW SHPQFEKGGGSGGGGSSGSAW SHPQFEK

Unresolved: 16-26, 68-81, 114-115, 144-185, 243-262, 443-489, 502, 621-640, 677-689, 812, 828-854, 1148-1288

**Name:** SC2.C1. 2P

**PDB:** 7CN9 (10)

QCVNLTTRTQLPPAYTNSFTRGVYYPDKVFRSSVLHSTQDLFLPFFSNVTWFHAIHVSGTNGTKRFDNPVLP  
FNDGVYFASTEKSNIIRGWIFGTTLDLSDKTSLLIVNNATNVVIK VCEFCNDPFLGVYYHKNNKSWMESEF  
RVYSSANNCTFEYVSQPFLMDLEGKQGNFKNLREFVFNIDGYFKIYKHTPINLVRDLPQGFSALEPLVDL  
PIGINITRFQTLALHRSYLT PGDSSSGWTAGAAA YVGYLQPRTFLLKYNENGTITDAVDCALDPLSETKC  
TLKSFTVEKGIYQTSNFRVQPTESIVRFPNITNLCPFGEVFNATRFASVYAWNRKRISNCVADYSVL YNSASF  
STFKCYGVSPTKLNLDLCTNVYADSFVIRGDEVQRQIAPGQTGKIADYNYKLPDDFTGCVIAWNSNNLDSKV  
GGNYNYLYRLFRKSNLKPFRDISTEIQAGSTPCNGVEGFNCYFPLQSYGFQPTNGVGYQPYRVVLSFEL  
LHAPATVCGPKKSTNLVKNKCVNFNFNGLTGTGVLTESNKKFLPFQQFGRDIADTTDAVRDPQTLEILDITP  
CSFGGVSVITPGTNTSNQVAVLYQDVNCTEVPVAIHADQLTPTWRVYSTGSNVFQTRAGCLIGAEHVNNSY  
ECDIPIGAGICASYQTQTNSPGSAGSVASQSIIAYTMSLGAENSVAYSNNNSIAIPTNFTISVTTEILPVSMTKTS  
VDCTMYICGDSTECNLLLQYGSFCTQLNRALTGIAVEQDKNTQEVFAQVKQIYKTPPIKDFGGFNFSQILP  
DPSKPSKRSFIEDLLFNKVTLADAGFIKQYGDCLGDIAARDLICAQKFNGLTVLPPLLDEMIAQYTSALLA  
GTITSGWTFGAGAALQIPFAMQMA YRFNGIGVTQNVLYENQKLIANQFN SAIGKIQDLSSTASALGKLQD  
VVNQNAQALNTLVKQLSSNF GAISSVLNDILSRDPEAEVQIDRLITGRLQSLQTYVTQQLIRAAEIRASAN  
LAATKMSECVLGQSKRVDFCGKGYHLSFPQSAPHGVVFLHVTVYVPAQEKNTTAPAICHGDKAHFPREG  
VFVSNGTHWFVTQRNFYEPQIITDNTFVSGNCDVVIGIVNNTVYDP

Unresolved: 14-26, 180-182, 444-489, 622-640, 673-685, 812-852

**Name:** SC2.C1.2P.TM4

**PDB:** 6XM0 (11)

QCVNLTTRTQLPPAYTNSFTRGVYYPDKVFRSSVLHSTQDLFLPFFSNVTWFHAIHVSGTNGTKRFDNPVLP  
FNDGVYFASTEKSNIIRGWIFGTTLDLSDKTSLLIVNNATNVVIK VCEFCNDPFLGVYYHKNNKSWMESEF  
RVYSSANNCTFEYVSQPFLMDLEGKQGNFKNLREFVFNIDGYFKIYKHTPINLVRDLPQGFSALEPLVDL  
PIGINITRFQTLALHRSYLT PGDSSSGWTAGAAA YVGYLQPRTFLLKYNENGTITDAVDCALDPLSETKC  
TLKSFTVEKGIYQTSNFRVQPTESIVRFPNITNLCPFGEVFNATRFASVYAWNRKRISNCVADYSVL YNSASF  
STFKCYGVSPTKLNLDLCTNVYADSFVIRGDEVQRQIAPGQTGKIADYNYKLPDDFTGCVIAWNSNNLDSKV  
GGNYNYLYRLFRKSNLKPFRDISTEIQAGSTPCNGVEGFNCYFPLQSYGFQPTNGVGYQPYRVVLSFEL  
LHAPATVCGPKKSTNLVKNKCVNFNFNGLTGTGVLTESNKKFLPFQQFGRDIADTTDAVRDPQTLEILDITP  
CSFGGVSVITPGTNTSNQVAVLYQDVNCTEVPVAIHADQLTPTWRVYSTGSNVFQTRAGCLIGAEHVNNSY  
ECDIPIGAGICASYQTQTNSPGSASSVASQSIIAYTMSLGAENSVAYSNNNSIAIPTNFTISVTTEILPVSMTKTS  
VDCTMYICGDSTECNLLLQYGSFCTQLNRALTGIAVEQDKNTQEVFAQVKQIYKTPPIKDFGGFNFSQILP  
DPSKPSKRSFIEDLLFNKVTLADAGFIKQYGDCLGDIAARDLICAQKFNGLTVLPPLLDEMIAQYTSALLA  
GTITSGWTFGAGAALQIPFAMQMA YRFNGIGVTQNVLYENQKLIANQFN SAIGKIQDLSSTASALGKLQD  
VVNQNAQALNTLVKQLSSNF GAISSVLNDILSRDPEAEVQIDRLITGRLQSLQTYVTQQLIRAAEIRASAN  
LAATKMSECVLGQSKRVDFCGKGYHLSFPQSAPHGVVFLHVTVYVPAQEKNTTAPAICHGDKAHFPREG  
VFVSNGTHWFVTQRNFYEPQIITDNTFVSGNCDVVIGIVNNTVYDPLQPELDSFKEELDKYFKNHTSPDVLD

LGDISGINASVVNIQKEIDRLNEVAKNLNESLIDLQELGKYEQ **GSGYIPEAPRDGQAYVRKDG EWVLLSTFL**  
**GRSLEVL FQGP GHHHHHHHSA WSHPQFEKGGGSGGGSGGSA WSHPQFEK**

Unresolved: 14-26, 70-79, 144-158, 174-185, 251-263, 445-446, 677-688, 829-848, 1148-1288

**Name:** SC2. TM4-1

**PDB:** 6XR8 (12)

MFVFLVLLPLVSSQCVNLTTRTQLPPAYTNSFTRGVYYPDKVFRSSVLHSTQDLFLPFFSNVTWFHAIHVSG  
TNGTKRFDNPVLPFNDGVYFASTEKSNIRGWIFGTTLDLSDKTQSLIVN NATNVVIK VCEFCNDPFLGVY  
YHKNNKSWMESEFRVYSSANNCTFEYVSQPFLMDLEGKQGNFKNLREFVFKNIDGYFKIYSKHTPINLVRD  
LPQGFSALEPLVDLPIGINITRFQTLALHRSYLT PGDSSSGW TAGAAAYYVGYLQPRTFLLKYNENGTITD  
AVDCALDPLSETKCTLSFTVEKGIYQTSNFRVQPTESIVRFPNITNLCPFGEVFNATRFASVYA WNRKRISN  
CVADYSVLYNSASFSTFKCYGVSPTKLNDLCFTNVYADSFVIRGDEVRQIAPGQTGKIADYNYKLPDDFTG  
CVIAWNSNNLDSKVG GNYNYLYR LFRKSNLKPFERDISTEIQAGSTPCNGVEGFNCYFPLQSYGFQPTNG  
VGYQPYRVVVL SFEL LHAPATVCGPKKSTNLVKNKCVNFNFNGLTGTGVLTESNKKFLPFQFGRDIADTT  
DAVRDPQTLEILDITPCSFGGVSVITPGTNTSNQVAVLYQDVNCTEVPVAIHADQLTPTWRVYSTGSNVFPQT  
RAGCLIGAEHVNNSECDIPIGAGICASYQTQNSP RRARSVASQSIAYTMSLGAENSVAYSNNNSIAIPTNFT  
ISVTTEILPVSMTKTSVDCTMYICGDSTEC SNLLQYGSFCTQLNRALTGIAVEQDKNTQEVFAQVKQIYKT  
PPIKDFGGFNFSQILPDPSKPSKRSFIEDLLFNKVT LADAGFIKQYGDCLGDIAARDLICAQKFNGLTVLPLL  
TDEMIAQYTSALLAGTITSGWTFGAGAALQIPFAMQMA YRFNGIGV TQNVLYENQKLIANQFN SAIGKIQD  
SLSSTASALGKLQDVVNQNAQALNTLVKQLSSNFGAISSVLNDILSR LDKVEAEVQIDRLITGRLQSLQTYV  
TQQLIRAAEIRASANLAATKMSECVLGQSKRVDFCGKGYHLSFPQSAPHGVVFLHVTYVPAQEKNF TTA  
PAICHGDKAHFPREGV FVSNGTHWFVTQRNFYEPQIITDNTFVSGNCDVVIGIVNNTVYDPLQPELDSFKE  
ELDKYFKNHTSPD VDLGDISGINASVVNIQKEIDRLNEVAKNLNESLIDLQELGKYEQYIKWPWYIWLGFIA  
GLIAIVMVTIMLCCMTSCCSCLKGCCSCGSCCKFDEDDSEPV LKGVKLHYT **LESGGGSA WSHPQFEKGGGS**  
**GGGSGSSAWSHPQFEK**

**Name:** SC2.C1. 2P. TM4-2

**PDB:** 6XM4 (11)

QCVNLTTRTQLPPAYTNSFTRGVYYPDKVFRSSVLHSTQDLFLPFFSNVTWFHAIHVSGTNGTKRFDNPVLP  
FNDGVYFASTEKSNIRGWIFGTTLDLSDKTQSLIVN NATNVVIK VCEFCNDPFLGVYYHKNNKSWMESEF  
RVYSSANNCTFEYVSQPFLMDLEGKQGNFKNLREFVFKNIDGYFKIYSKHTPINLVRDLPQGFSALEPLVDL  
PIGINITRFQTLALHRSYLT PGDSSSGW TAGAAAYYVGYLQPRTFLLKYNENGTITDAVDCALDPLSETKC  
TLKSFTVEKGIYQTSNFRVQPTESIVRFPNITNLCPFGEVFNATRFASVYA WNRKRISN CVADYSVLYNSASF  
STFKCYGVSPTKLNDLCFTNVYADSFVIRGDEVRQIAPGQTGKIADYNYKLPDDFTGCVIAWNSNNLDSKV  
GGNYNYLYR LFRKSNLKPFERDISTEIQAGSTPCNGVEGFNCYFPLQSYGFQPTNGVGYQPYRVVVL SFEL  
LHAPATVCGPKKSTNLVKNKCVNFNFNGLTGTGVLTESNKKFLPFQFGRDIADTTDAVRDPQTLEILDITP  
CSFGGVS VITPGTNTSNQVAVLYQDVNCTEVPVAIHADQLTPTWRVYSTGSNVFPQTRAGCLIGAEHVNNSY  
ECDIPIGAGICASYQTQNSP **GSAS**SVASQSIAYTMSLGAENSVAYSNNNSIAIPTNFTISVTTEILPVSMTKTS  
VDCTMYICGDSTEC SNLLQYGSFCTQLNRALTGIAVEQDKNTQEVFAQVKQIYKTPPIKDFGGFNFSQILP  
DPSKPSKRSFIEDLLFNKVT LADAGFIKQYGDCLGDIAARDLICAQKFNGLTVLPLL TDEMIAQYTSALLA  
GTITSGWTFGAGAALQIPFAMQMA YRFNGIGV TQNVLYENQKLIANQFN SAIGKIQD SLSSTASALGKLQD  
VVNQAQALNTLVKQLSSNFGAISSVLNDILSR LD **PPE**AEVQIDRLITGRLQSLQTYVTQQLIRAAEIRASAN  
LAATKMSECVLGQSKRVDFCGKGYHLSFPQSAPHGVVFLHVTYVPAQEKNF TTA PAICHGDKAHFPREG  
V FVSNGTHWFVTQRNFYEPQIITDNTFVSGNCDVVIGIVNNTVYDPLQPELDSFKEELDKYFKNHTSPD V  
LGDISGINASVVNIQKEIDRLNEVAKNLNESLIDLQELGKYEQ **GSGYIPEARDGQAYVRKDG EWVLLSTFLG**  
**RSLEVL FQGP GHHHHHHHSA WSHPQFEKGGGSGGGSGGSA WSHPQFEK**

Unresolved: 14-26, 70-79, 144-185, 251-263, 445-446, 677-688, 829-848, 1148-1288

**Name:** SC2.C1.TM4-2

**PDB:** 7KDH (13)

MFVFLVLLPLVSSQCVNLTTRTQLPPAYTNSFTRGVYYPDKVFRSSVLHSTQDLFLPFFSNVTWFHAIHVSG  
TNGTKRFDNPVLPFNDGVYFASTEKSNIRGWIFGTTLDLSDKTQSLIVN NATNVVIK VCEFCNDPFLGVY  
YHKNNKSWMESEFRVYSSANNCTFEYVSQPFLMDLEGKQGNFKNLREFVFKNIDGYFKIYSKHTPINLVRD

LPQGFSALEPLVDLPIGINITRFQTLALHRSYLTPGDSSSGWTAGAAAYYVGYLQPRTFLLKYNENGTITD  
AVDCALDPLSETKCTLKSTVEKGIYQTSNFRVQPTESIVRFPNITNLCPFGEVFNATRFASVYA WNRKRISN  
CVADYSVLYNSASFSTFKCYGVSPTKLNLDL CFTNVYADSFVIRGDEVQRQIAPGQTGKIADYNYKLPDDFTG  
CVIAWNSNNLDSKVGGNYNLYRLFRKSNLKPFERDISTEYIYQAGSTPCNGVEGFNCYFPLQSYGFQPTNG  
VGYQPYRVVLSFELLHAPATVCGPKKSTNLVKNKCVNFNFNGLTGTGVLTESNKKFLPFQFGRDIADTT  
DAVRDPQTEILDITPCSFSGGVSVITPGTNTSNQVAVLYQDVNCTEVPVAIHADQLTPTWRVYSTGNSVNFQT  
RAGCLIGAEHVNSYECDIPIGAGICASYQTQTNSPGSASSVASQSIIAYTMSLGAENSVAYSNNNSIAIPTNFT  
ISVTTEILPVSMTKTSVDCTMYICGDSSTEC SNLLLQYGSFCTQLNRALTGIAVEQDKNTQEVFAQVKQIYKT  
PPIKDFGGFNFSQILPDPSKPSKRSFIEDLLFNKVTLADAGFIKQYGDCLGDIAARDLICAQKFNGLTVLPLL  
TDEMIAQYTSALLAGTITSGWTFGAGAALQIPFAMQMA YRFNGIGVTONVLYENQKLIANQFN SAIGKIQD  
SLSSTASALGKLQDVVNQNAQALNTLVKQLSSNFGA ISSVLNDILSRLDKVEAEVQIDRLITGRLQSLQTYV  
TQQLIRAAEIRASANLAATKMSECVLGQSKRVDFCGKGYHLM SFPQSAPHGVVFLHVTYVPAQEKNFTTA  
PAICHGKAHFPRGVFVSNGTHWFVTQRNFYEPQIITDNTFVSGNCDVVIGIVNNTVYDPLQPELDSFKE  
ELDKYFKNHTSPDVLGDISGINASVVNIQKEIDRLNEVAKNLNESLIDLQELGKYEQ GSGYIPEAPRDGQA  
YVRKDG EWVLLSTFLGRSLEVLFGQPGHHHHHHHSA WSHPOFEKGGGSGGGGSGGSA WSHPOFEK

Unresolved: 1-26, 70-81, 144-185, 243-262, 443-447, 471-489, 502, 621-640, 677-689, 812-852, 1148-1288

**Name:** BiPro-0

**PDB:** 6ZP7 (14)

MFVFLVLLPLVSSQCVNLTRTQLPPAYTNSFTRGVYYPDKVFRSSVLHSTQDLFLPFFSNVTWFHAIHVSG  
TNGTKRFDNPVLPFNDGVYFASTSEKSNIRGWIFGTTLD SKTQSLIVN NATNVVIK VCEFCNDPFLGVY  
YHKNNKSWMESEFRVYSSANNCTFEYVSQPFLMDLE GKQGNFKNLREFVFKNIDGYFKIY SKHTPINLV RD  
LPQGFSALEPLVDLPIGINITRFQTLALHRSYLTPGDSSSGWTAGAAAYYVGYLQPRTFLLKYNENGTITD  
AVDCALDPLSETKCTLKSTVEKGIYQTSNFRVQPTESIVRFPNITNLCPFGEVFNATRFASVYA WNRKRISN  
CVADYSVLYNSASFSTFKCYGVSPTKLNLDL CFTNVYADSFVIRGDEVQRQIAPGQTGKIADYNYKLPDDFTG  
CVIAWNSNNLDSKVGGNYNLYRLFRKSNLKPFERDISTEYIYQAGSTPCNGVEGFNCYFPLQSYGFQPTNG  
VGYQPYRVVLSFELLHAPATVCGPKKSTNLVKNKCVNFNFNGLTGTGVLTESNKKFLPFQFGRDIADTT  
DAVRDPQTEILDITPCSFSGGVSVITPGTNTSNQVAVLYQDVNCTEVPVAIHADQLTPTWRVYSTGNSVNFQT  
RAGCLIGAEHVNSYECDIPIGAGICASYQTQTNSPRRARSVASQSIIAYTMSLGAENSVAYSNNNSIAIPTNFT  
ISVTTEILPVSMTKTSVDCTMYICGDSSTEC SNLLLQYGSFCTQLNRALTGIAVEQDKNTQEVFAQVKQIYKT  
PPIKDFGGFNFSQILPDPSKPSKRSFIEDLLFNKVTLADAGFIKQYGDCLGDIAARDLICAQKFNGLTVLPLL  
TDEMIAQYTSALLAGTITSGWTFGAGAALQIPFAMQMA YRFNGIGVTONVLYENQKLIANQFN SAIGKIQD  
SLSSTASALGKLQDVVNQNAQALNTLVKQLSSNFGA ISSVLNDILSRLDPEAEVQIDRLITGRLQSLQTYVT  
QQLIRAAEIRASANLAATKMSECVLGQSKRVDFCGKGYHLM SFPQSAPHGVVFLHVTYVPAQEKNFTTAP  
AICHGKAHFPRGVFVSNGTHWFVTQRNFYEPQIITDNTFVSGNCDVVIGIVNNTVYDPLQPELDSFKEE  
LDKYFKNHTSPDVLGDISGINASVVNIQKEIDRLNEVAKNLNESLIDLQELGKYEQYIKWPWYIWLGFIA G  
LIAIVMVTIMLCCMTSCCCLKGCCSCGSCCKFDEDDSEPV LKGVKLHYT

Unresolved: 40-53, 105-134, 147-160, 216-234, 419-420, 594-612, 650-661, 802-824, 1122-1273

**Name:** SC2.TM5

**PDB ID:** 7C2L (35)

MFVFLVLLPLVSSQCVNLTRTQLPPAYTNSFTRGVYYPDKVFRSSVLHSTQDLFLPFFSNVTWFHAIHVSG  
TNGTKRFDNPVLPFNDGVYFASTSEKSNIRGWIFGTTLD SKTQSLIVN NATNVVIK VCEFCNDPFLGVY  
YHKNNKSWMESEFRVYSSANNCTFEYVSQPFLMDLE GKQGNFKNLREFVFKNIDGYFKIY SKHTPINLV RD  
LPQGFSALEPLVDLPIGINITRFQTLALHRSYLTPGDSSSGWTAGAAAYYVGYLQPRTFLLKYNENGTITD  
AVDCALDPLSETKCTLKSTVEKGIYQTSNFRVQPTESIVRFPNITNLCPFGEVFNATRFASVYA WNRKRISN  
CVADYSVLYNSASFSTFKCYGVSPTKLNLDL CFTNVYADSFVIRGDEVQRQIAPGQTGKIADYNYKLPDDFTG  
CVIAWNSNNLDSKVGGNYNLYRLFRKSNLKPFERDISTEYIYQAGSTPCNGVEGFNCYFPLQSYGFQPTNG  
VGYQPYRVVLSFELLHAPATVCGPKKSTNLVKNKCVNFNFNGLTGTGVLTESNKKFLPFQFGRDIADTT  
DAVRDPQTEILDITPCSFSGGVSVITPGTNTSNQVAVLYQDVNCTEVPVAIHADQLTPTWRVYSTGNSVNFQT  
RAGCLIGAEHVNSYECDIPIGAGICASYQTQTN SPRGSASSVASQSIIAYTMSLGAENSVAYSNNNSIAIPTNF  
TISVTTEILPVSMTKTSVDCTMYICGDSSTEC SNLLLQYGSFCTQLNRALTGIAVEQDKNTQEVFAQVKQIYK  
TPPIKDFGGFNFSQILPDPSKPSKRSFIEDLLFNKVTLADAGFIKQYGDCLGDIAARDLICAQKFNGLTVLPLL  
LTDEMIAQYTSALLAGTITSGWTFGAGAALQIPFAMQMA YRFNGIGVTONVLYENQKLIANQFN SAIGKIQ



DSLSSTASALGKLQDVVNQNAQALNTLVKQLSSNFGAISSVLNDILSRLDPPEAEVQIDRLITGRLQSLQTY  
VTQQLIRAAEIRASANLAATKMSECVLGQSKRVDFCGKGYHLSMFPQSAPHGVVFLHVTVYVPAQEKNF  
APAICHGDKAHFPREGVVFVSNHGWVFTQRNFYEPQIITDNTFVSGNCDVVIGVNNVYDPLQPELDSFK  
EELDKYFKNHTSPDVLGDISGINASVVNIQKEIDRLNEVAKNLNESLIDLQELGKYEQYIKWPWYIWLGI  
AGLIAIVMVTIMLCCMTSCCCLKGCCSCGSCCKFDEDDSEPVKGVKLVHT**L**EDYKDDDDK

## 2. SARS-CoV Protein Sequences

### SARS-CoV WT (Uniprot ID P59594) (15)

MFIFLLFLTSTSGSDLDRCTTFDDVQAPNYTQHTSSMRGVVYYPDEIFRSDTLYLTQDLFLPFYSNVTGFHTIN  
HTFGNPVPIPKDGIYFAATEKSNVVRGWVFGSTMNNKSQSVIIINNSTNVVIRACNFELCDNPFPAVSKPMG  
TQHTMIFDNAFNCTFEYISDAFSLDVSEKSGNFKHLREFVFNKNDGFLYVYKGYQPIDVVRDLPSGFNTLK  
PIFKLPLGINITNFRAILTAFAQDIWGTSAAYFVGYLKPTTFMLKYDENGTTIDA VDCSQNPLAELKCSV  
KSFEIDKGIYQTSNFRVVPDGDVVRFPNITNLCPFGEVFNATKFPVYAWERKKISNCVADYSVLNSTFFST  
FKCYGVSATKLNLDLFCFSNVYADSFVVKGDDVQRQIAPGQTGVADYNYKLPDDFMGCVLAWNTRNIDATS  
TGNVNYKYRYLRHGKLRPFRDISNVFPDGDGKPTPALNCYWPLNDYGFYTTTGIGYQPYRVVLSFEL  
LNAPATVCGPKLSTDLIKNQCVNFNENGLTGTGVLTPSSKRFQPFQFGRDVSDFDTSVRDPKTSEILDISP  
SFGGVSVITPGTNASSEVAVLYQDVNCTDVSTAIHADQLTPAWRIYSTGNNVFQTQAGCLIGAHEVDTSYE  
CDIPIGAGICASYHTVSLRSTSQKSIVAYTMSLGADSSIAYSNNTIAIPTNFSISITTEVMPVSMAKTSVDCN  
MYICGDSTECANLLLQYGSFCTQLNRLSGIAAEQDRNTREVFAQVKQMYKTPTLKYFGGFNFSQILPDPL  
KPTKRSFIEDLLFNKVTLADAGFMKQYGECLGDINARDLCAQKFNGLTVLPPLLTDMMIAAYTAALVSGT  
ATAGWTFGAGAALQIPFAMQMAYRFNGIGVTQNVLYENQKQIANQFNKAIQIQESLTTTSTALGKLQDV  
VNQNAQALNTLVKQLSSNFGAISSVLNDILSRLDKVEAEVQIDRLITGRLQSLQTYVTQQLIRAAEIRASANL  
AATKMSECVLGQSKRVDFCGKGYHLSMFPQAAPHGVVFLHVTVYVPSQERNFTTAPAICHEGKAYFPREGV  
FVFNGTSWFITQRNFSPQIITDNTFVSGNCDVVIGIINNTVYDPLQPELDSFKEELDKYFKNHTSPDVLG  
DISGINASVVNIQKEIDRLNEVAKNLNESLIDLQELGKYEQYIKWPWYVWLGFIAGLIAIVMVTILLCCMTS  
CCSCLKGACSCGSCCKFDEDDSEPVKGVKLVHT

**Name:** SC1. TM1

**PDB:** 6ACD (35)

MFIFLLFLTSTSGSDLDRCTTFDDVQAPNYTQHTSSMRGVVYYPDEIFRSDTLYLTQDLFLPFYSNVTGFHTIN  
HTFGNPVPIPKDGIYFAATEKSNVVRGWVFGSTMNNKSQSVIIINNSTNVVIRACNFELCDNPFPAVSKPMG  
TQHTMIFDNAFNCTFEYISDAFSLDVSEKSGNFKHLREFVFNKNDGFLYVYKGYQPIDVVRDLPSGFNTLK  
PIFKLPLGINITNFRAILTAFAQDIWGTSAAYFVGYLKPTTFMLKYDENGTTIDA VDCSQNPLAELKCSV  
KSFEIDKGIYQTSNFRVVPDGDVVRFPNITNLCPFGEVFNATKFPVYAWERKKISNCVADYSVLNSTFFST  
FKCYGVSATKLNLDLFCFSNVYADSFVVKGDDVQRQIAPGQTGVADYNYKLPDDFMGCVLAWNTRNIDATS  
TGNVNYKYRYLRHGKLRPFRDISNVFPDGDGKPTPALNCYWPLNDYGFYTTTGIGYQPYRVVLSFEL  
LNAPATVCGPKLSTDLIKNQCVNFNENGLTGTGVLTPSSKRFQPFQFGRDVSDFDTSVRDPKTSEILDISP  
SFGGVSVITPGTNASSEVAVLYQDVNCTDVSTAIHADQLTPAWRIYSTGNNVFQTQAGCLIGAHEVDTSYE  
CDIPIGAGICASYHTVSLRSTSQKSIVAYTMSLGADSSIAYSNNTIAIPTNFSISITTEVMPVSMAKTSVDCN  
MYICGDSTECANLLLQYGSFCTQLNRLSGIAAEQDRNTREVFAQVKQMYKTPTLKYFGGFNFSQILPDPL  
KPTKRSFIEDLLFNKVTLADAGFMKQYGECLGDINARDLCAQKFNGLTVLPPLLTDMMIAAYTAALVSGT  
ATAGWTFGAGAALQIPFAMQMAYRFNGIGVTQNVLYENQKQIANQFNKAIQIQESLTTTSTALGKLQDV  
VNQNAQALNTLVKQLSSNFGAISSVLNDILSRLDKVEAEVQIDRLITGRLQSLQTYVTQQLIRAAEIRASANL  
AATKMSECVLGQSKRVDFCGKGYHLSMFPQAAPHGVVFLHVTVYVPSQERNFTTAPAICHEGKAYFPREGV  
FVFNGTSWFITQRNFSPQIITDNTFVSGNCDVVIGIINNTVYDPLQPELDSFKEELDKYFKNHTSPDVLG  
DISGINASVVNIQKEIDRLNEVAKNLNESLIDLQELGKYEQYIKWPWSHPQFEK

**Name:** SC1.S1.TM2

**PDB:** 6NB6 (35)

MGILPSPGMPALLSLVLLSVLLMGCVAETGTSDDLDRCTTFDDVQAPNYTQHTSSMRGVVYYPDEIFRSDTLY  
YLTQDLFLPFYSNVTGFHTINHTFDNPIPKDGIYFAATEKSNVVRGWVFGSTMNNKSQSVIIINNSTNVV  
RACNFELCDNPFPAVSKPMGTQHTMIFDNAFNCTFEYISDAFSLDVSEKSGNFKHLREFVFNKNDGFLYV  
YKGYQPIDVVRDLPSGFNTLKPIFKLPLGINITNFRAILTAFAQDTWGTSAAYFVGYLKPTTFMLKYDE  
NGTTIDA VDCSQNPLAELKCSVKSFEIDKGIYQTSNFRVVPDGDVVRFPNITNLCPFGEVFNATKFPVYAW

ERKKISNCVADYSVLYNSTFFSTFKCYGVSATKLNLCFSNVYADSFVVKGDDVVRQIAPGQTGVIADYNYK  
LPDDFMGCVLAWNTRNIDATSTGNYNYKYRYLRHGKLRPFERDISNVPFSPDGKPCPPALNCYWPLNDY  
GFYTTTGIGYQPYRVVLSFELLNAPATVCGPKLSTDLIKNQCVNFNGLTGTGVLTPSSKRFPFQFGR  
DVSDFTDSVRDPKTSEILDSPCSFGGVSVITPGTNASSEVAVLVYQDVNCTDVSTAIHADQLTPAWRIYSTGN  
NVFQTQAGCLIGAHEVDTSYECDIPIGAGICASYHTVSLLRSTSQKSIVAYTMSLGADSSIAYSNNTIAIPTNF  
SISITTEVMPVSMAKTSVDCNMYICGDSTECANLLLQYGSFCTQLNRALSGLAAEQDRNTREVFAQVKQMY  
KTPTLKYFGGFNFSQILPDPLKPTKRSFIEDLLFNKVTLADAGFMKQYGECLGDINARDLICAQKFNGLTVL  
PPLLTDDMIAAYTAALVSGTATAGWTFGAGAALQIPFAMQMAYRFNGIGVTQNVLYENQKQIANQFNKAI  
SQIQESLTTTSTALGKLQDVVNQNAQALNTLVKQLSSNFGAISSVLDILSRLDPPEAEVQIDRLITGRLQSL  
QTYVTQQLIRAAEIRASANLAATKMSECVLGQSKRVDFCGKGYHLSFPQAAPHGVVFLHVTVVPSQERN  
FTTAPAICHEGKAYFPREGVVFVNGTSWFITQRNFFSPQIITDNTFVSGNCDVVIGIINNTVYDPLQPELDSF  
KEELDKYFKNHTSPDVLGDISGINASVVNIQKEIDRLNEVAKNLNESLIDLQELGKYEYQYKGSRENLYF  
**QGGGSGYIPEAPRDGQAYVRKDGWVLLSTFLGHHHHHHHH**

### 3. MERS-CoV Protein Sequences

#### MERS-CoV WT (Uniprot ID K9N5Q8) (16)

MIHSVLLMFLLTPTESYVDVGPDSVKSACIEVDIQQTFDFKTWPRPIDVSKADGHIYPQGRITYSNITITYQGL  
FPYQGDHGDYMYVYSAGHATGTTTPQKLFVANYSQDVKQFANGFVVRIGAAANSTGTVIISPSTSATIRKIYP  
AFMLGSSVGNFSDGKMGRRFNHTLVLLPDGCGTLLRAFYCILEPRSGNHCPAGNSYTSFATYHTPATDCSD  
GNYNRNASLNSFKEYFNLRNCTFMYTYNITEDEILEWFGITQTAQGVHLFSSRYVDLYGGNMFQFATLPVY  
DTIKYYSIIPHSIRSIQSDRKA WAAFYVYKLQPLTFLDFSVDGYIRRAIDCGFNDSLHCSYESFDVESGV  
YSVSSFEAKPSGSVVEQAEGVECDFSPLLSGTPPQVYNFKRLVFTNCNYNLTKLLSLFSVNDFTCSQISPAAI  
ASNCYSSLILDYFSYPLSMKSDLSVSSAGPISQFNKQSFNSPTCLILATVPHNLTTITKPLKYSYINKCSRFLS  
DDRTEVPQLVNANQYSPCVSIVPSTVWEDGDYRQKLSPLEGGGWLVASGSTVAMTEQLQMFGGITVQY  
GTDNNSVCPKLEFANDTKIASQLGNCVEYSLYGVSGRGVFNQCTAVGVRQQRVYDAYQNLVGYSSDDG  
NYYCLRACVSPVSVIYDKETKTHATLFGSVACEHISSTMSQYSRSTRSMLKRRDSTYGPLQTPVGCVLGL  
VNSSLFVEDCKLPLGQSLCALPDTPTLTPRSVRSVPGEMRLASIAFNHPIQVDQLNSSFYKLSIPTNSFGVTQ  
EYIQTTIQKVTVDCKQYVCNGFQKCEQLLREYGFQFCSKINQALHGANLRQDDSVRNLFASVKSSQSSPIIPG  
FGGDFNLTLLEPVSISTGSRARSARSAIEDLLFDKVTIADPGYMQGYDDCMQQGPASARDLICAQYVAGYKVL  
PPLMDVNMEAAAYTSSLLGSIAGVGTAGLSSFAAIPFAQSIFYRLNGVGITQQVLSNQKLIANKFNQALGA  
MQTGFTTTNEAFHKVQDAVNNNAQALSKLASELSNTFGAISASIGDIIQRDLVLEQDAQIDRLINGRLTTLN  
AFVAQQLVRSESAALSAQLAKDKVNECVKAQSKRSGFCGQGTHIVSFVVPNGLYFMHVGYYPSNHIEV  
VSAYGLCDAANPTNCIAPVNGYFIKTNNTRIVDEWYSYTGSSFYAPEPITSLNTKYVAPQVTYQNIQNLPPPL  
LGNSTGIDFQDELDEFFKNVSTIPNFGSLTQINTLLDLTYEMLSLQVVKALNESYIDLKELGNYYTYNK  
WPWYIWLGFIAGLVALALCVFFILCCTGCGTNCMGK  
LKCNRCCDRYEEYDLEPHKVHVH

**Name:** MC. SD. TM1

**PDB:** 5X5C & 5X5F (36)

YVDVGPDSVKSACIEVDIQQTFDFKTWPRPIDVSKADGHIYPQGRITYSNITITYQGLFPYQGDHGDYMYVYS  
GHATGTTTPQKLFVANYSQDVKQFANGFVVRIGAAANSTGTVIISPSTSATIRKIYPAFMLGSSVGNFSDGK  
MGRRFNHTLVLLPDGCGTLLRAFYCILEPRSGNHCPAGNSYTSFATYHTPATDCSDGNYNRNASLNSFKEYF  
NLRNCTFMYTYNITEDEILEWFGITQTAQGVHLFSSRYVDLYGGNMFQFATLPVYDTIKYYSIIPHSIRSIQ  
SDRKA WAAFYVYKLQPLTFLDFSVDGYIRRAIDCGFNDSLHCSYESFDVESGVYSVSSFEAKPSGSVVE  
QAEGVECDFSPLLSGTPPQVYNFKRLVFTNCNYNLTKLLSLFSVNDFTCSQISPAAIASNCYSSLILDYFSYPL  
SMKSDLSVSSAGPISQFNKQSFNSPTCLILATVPHNLTTITKPLKYSYINKCSRLLSDDRTEVPQLVNANQY  
SPCVSIVPSTVWEDGDYRQKLSPLEGGGWLVASGSTVAMTEQLQMFGGITVQYGTDNNSVCPKLEFAND  
TKIASQLGNCVEYSLYGVSGRGVFNQCTAVGVRQQRVYDAYQNLVGYSSDDGNYYCLRACVSPVSVI  
YDKETKTHATLFGSVACEHISSTMSQYSRSTRSMLKRRDSTYGPLQTPVGCVLGLVNSSLFVEDCKLPLGQ  
SLCALPDTPTLTPRSVSSVPGEMRLASIAFNHPIQVDQLNSSFYKLSIPTNSFGVTQYIQTTIQKVTVDCK  
QYVCNGFQKCEQLLREYGFQFCSKINQALHGANLRQDDSVRNLFASVKSSQSSPIIPGFGGDFNLTLLEPVSIS  
TGRSARSARSAIEDLLFDKVTIADPGYMQGYDDCMQQGPASARDLICAQYVAGYKVLPLMDVNMEAAAYTS  
SLLGSIAGVGTAGLSSFAAIPFAQSIFYRLNGVGITQQVLSNQKLIANKFNQALGAMQTGFTTTNEAFQK  
VQDAVNNNAQALSKLASELSNTFGAISASIGDIIQRDLVLEQDAQIDRLINGRLTTLNAFVAQQLVRSESA

LSAQLAKDKVNECVKAQSKRSGFCGQGTHIVSFVFNAPNGLYFMHVGYYPSNHIEVVSAYGLCDAANPT  
NCIAPVNGYFIKTNTRIVDEWSYTGSSFYAPEPITSLNTKYVAPQVTYQNISTNLPPPLLGNSTGIDFQDEL  
EFFKNVSTSIPNFGSLTQINTLLDLTYEMLSLQQVVKALNESYIDLKELGNYTYYNK **EFRLVPRGSPGSGYI**  
**PEAPRDGQAYVRKDGWVLLSTFLGHHHHH**

**Name:** MC.TM2

**PDB:** 5W9K (37)

MIHSVFLLMFLLTPTESYVDVGPDSVKSACIEVDIQOTFFDKTWPRPIDVSKADGIIYPQGRYTSNITITYQGL  
FPYQGDHGDYVYSAGHATGTTTPQKLFVANYSQDVKQFANGFVVRIGAAAANSTGTVIIISPSTSATIRKIYP  
AFMLGSSVGNFSDGKMGRFFNHTLVLLPDGCGTLLRAFYCILEPRSGNHCPAGNSYTSFATYHTPATDCSD  
GNYNRNASLNSFKEYFNLRNCTFMYTYNITEDEILEWFGITQTAQGVHLFSSRYVDLYGGNMVFQFATLPVY  
DTIKYYSIIPHRSIRSIQSDRKAWAAFVYVYKLQPLTFLDFSVVDGYIRRAIDCGFNDLSQLHCSYESFDVESGV  
YSVSSFEAKPSGSVVEQAEGVECDFSPLLSGTPPVYVNFKRLVFTNCNYNLTKLLSLSVNDFTCSQISPAAI  
ASNCYSSLILDYFSYPLSMKSDLSVSSAGPISQFNKQSFNSPTCLILATVPHNLTTITKPLKYSYINKCSRFLS  
DDRTEVPQLVNANQYSPCVSIVPSTVWEDGDYRQKLSPLEGGGWLVASGSTVAMTEQLQMGFGITVQY  
GTDNTSVCPLKLEFANDTKIASQLGNCVEYSLYGVSGRGVFNQCTAVGVRRQRFVYDAYQNLVGYYSDDG  
NYYCLRACVSPVSVIYDKETKTHATLFGSVACEHISSTMSQYSRSTRSMKRRDSTYGPLQTPVGCVLGL  
VNSSLFVEDCKPLGQSLCALPDTPSTLTPASVGSVPGEMRLASIAFNHPIQVDQLNSSFYKLSIPTNFSFGVT  
QEYIQTTIQKVTVDCKQYVCNGFQKCEQLLREYGFCSKINQALHGANLRQDDSVRNLFASVKSSQSSPIIP  
GFGGDFNLTLEPVSISSGSRARSIAIEDLLFDKVTIADPGYMQGYDDCMQQGPASARDLCAQYVAGYKV  
LPPLMDVNMEAAYTSSLLGSIAGVGTAGLSSFAAIPFAQSIFYRLNGVGITQQVLSQKLIANKFNQALG  
AMQTGFTTTNEAFHKVQDAVNNAQALSCLASELSNTFGAISASIGDIIQRLDPPEQDAQIDRLINGRLTTL  
NAFVAQQLVRSESAALSAQLAKDKVNECVKAQSKRSGFCGQGTHIVSFVFNAPNGLYFMHVGYYPSNHIE  
VVSAYGLCDAANPTNCIAPVNGYFIKTNTRIVDEWSYTGSSFYAPEPITSLNTKYVAPQVTYQNISTNLPPP  
LLGNSTGIDFQDELDEFFKNVSTSIPNFGSLTQINTLLDLTYEMLSLQQVVKALNESYIDLKELGNYTY **GSG**  
**YIPEAPRDGQAYVRKDGWVLLSTFLGRSLEVLFO**

#### 4. Supplementary Table 1

See attached file titled [Supplementary Table 1.xlsx](#) for extensive review of individual binding properties and epitopes of over 40 antibodies and their related pdb identifiers. References for the table are located in this document.

#### 5. Protein sequence alignment and comparison

Multiple sequence alignment of spike protein sequences are attached in file [Spike\\_Protein\\_Alignment\\_Tarakanova.clustal\\_num](#)

#### 6. Dynamic domain & NMA videos

Like the Dynamic Domain index files, videos showing the NMA trajectory and highlighted dynamic domains are labeled [PDB ID].mp4

#### 7. Results of artificial controls

The graphical results of the artificial controls used in **Results section 3.4** are listed below:

##### i. SC2.S2.TM1-1' & WT'-A

Combined Unresolved regions (WT'A):- 1-26, 70-81, 114-115, 144-185, 243-262, 443-489, 502, 621-640, 677-689, 812, 828-854, 1148-end

Combined unresolved regions (SC2.S2.TM1-1'): 1-26, 70-81,114-115,144-185,243-262, 443-489,502,618-640, 677-698, 812, 828-859, 1148-end

ii. **SC2.C1.2P' & SC2.C1.2P.TM4'**,

Combined unresolved regions:12-26, 70-81, 114-115, 144-165, 173-185, 243-263, 445-446, 621-640, 613-640, 673-690, 812-854, 1148-end

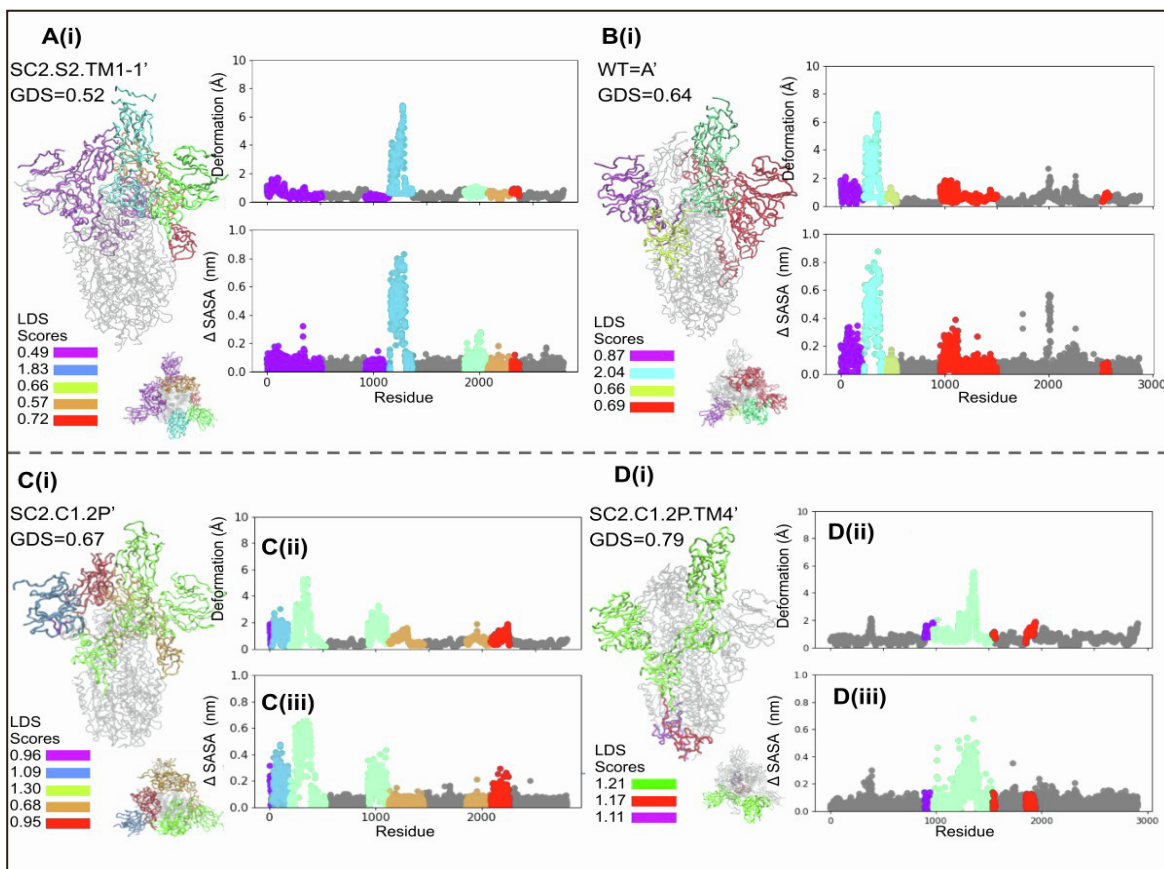

**SI Figure 1:** The domain dynamics associated with (A) WT'A, (B) SC2.S2.TM1-1', (C) SC2.C1.2P' and (D) SC2.C1.2P.TM4' ANMs. The PDB ID, global dynamics score (GDS), local dynamics scores (LDSs), deformation profile (ii), and  $\Delta$  SASA profile (iii) is listed for each structure. On each 3-D structure and profile, identified dynamic domains are labeled in different colors and their LDSs are listed in each legend. The corresponding dynamic domain breakdowns are located in Figure 4 and Figure 1.

## 8. Derived features used for thermal stability model training

The features used to train the thermal stability predictor are those contained in the original combined data set and also those computed by the following resources. The Amber software (39) was used to find bond length, bond angle, dihedral angles, van der Waals contributions, electrostatic contributions, polar solvation, total gas free energy, total solvation free energy, and total system energy. The FoldX software (40) was used to find solvation energy for polar groups, solvation energy for apolar groups, water bridge hydrogen bonding, intra-molecule hydrogen bonding, electrostatic interactions between charged

groups, and atomic clash overlaps. The remaining features are outlined in **Table S3**. Amino acid-related biological features are found using AAindex (42). Disorder and Relative Surface Accessibility are found using the SCRATCH webserver (43). All remaining features in **Table S3** are found using the Expsy ProtScale tool (41).

**Table S3:** Summary of the biochemical, structural, and biological features used for thermal stability predictor training.

| Biochemical Features                       | Structural features                       | Biological Features         |
|--------------------------------------------|-------------------------------------------|-----------------------------|
| Molecular Weight                           | Solvent Accessibility                     | Mobility of Amino Acids     |
| Hydrophobicity Index                       | 3-State Secondary Structure               | Codon Amount per Amino Acid |
| Side Chain pKa                             | Bulkiness                                 |                             |
| Frequencies of buried and exposed sequence | Buried Area from Standard to Folded State |                             |
| Electrostatic Charge                       | Disorder                                  |                             |
|                                            | Flexibility Index                         |                             |
|                                            | Relative Surface Accessibility            |                             |
|                                            | Absolute Surface Accessibility            |                             |

## 9. Analysis of different PDB structures corresponding to a single sequence

### i. Statistical threshold model from PDB structures

To resolve whether ANM models can accurately capture differences in dynamic behavior between proteins of different sequence, we selected multiple structures from the PDB that correspond to the same sequence to analyze the correlation between protein structure alignment and the difference in their dynamical signature. We measure the difference between dynamical signatures by the average difference and standard deviation between per-residue protein deformations computed from the ANM-derived trajectory. We explore different levels of protein structural alignment to establish a threshold for measured structural alignment and dynamical similarity. This allows us to evaluate if compared protein structures (see **Results Section 3.4**) experience changes that can in fact be attributed to sequence, or are artifacts of the ANM model. The PDBs used as case studies are listed in **Supplementary Table 2** (see attached file [Supplementary\\_Table\\_2.xlsx](#)) and this information is summarized in **Figure 3**. Taken together, the results from the PDB case studies establish a model that describes how NMA dynamics should differ between structures of the same sequence as the structural alignment between compared PDBs differs. Linear regression is used to fit the correlated data to a best fit line, then to calculate the corresponding 95% confidence interval and prediction interval (**SI Figure 2-B**). The prediction interval indicates an estimate of an interval in which a future observation will fall and the confidence interval indicates a range of values that is likely to contain the true mean of the population. From this model, we can understand if the dynamical differences measured between two compared proteins with different sequences are likely to be driven by sequence differences or structural differences (i.e. model artifacts). Data points that fall above the best fit line may attribute their dynamical differences to sequence. Data points below the best fit line indicate that dynamical difference may be an artifact of the model.

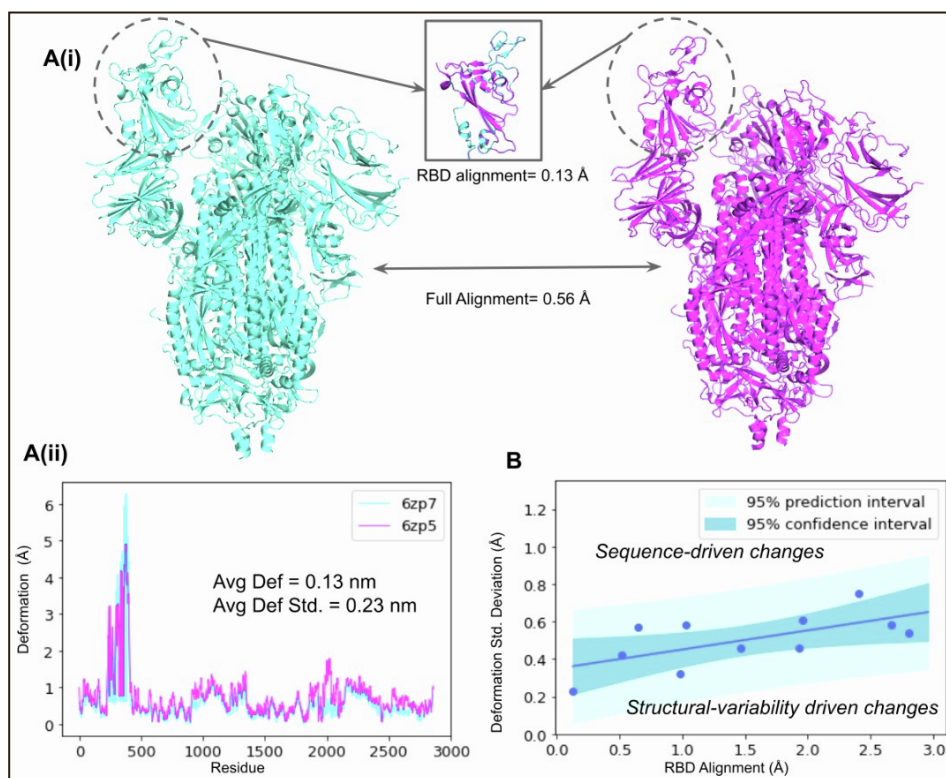

**SI Figure 2:** Proteins selected for a single case study **(A)**, visualization of their structural alignment **(i)** and alignment of their NMA deformations **(ii)**. This pair presents high structural alignment and level of dynamics correspondence and creates a single data point that is plotted with the remaining results of the case studies **(B)**. The plot shows the protein deformation trend variability as a function of the static RBD alignment **(B)**. Note that low alignment values indicate better structure correspondence and high alignment values indicate poorer structure correspondence.

## ii. Contribution of sequence and structure to mutant dynamic variability

After establishing a model that characterizes the relationship between PDB structural alignment between pairs of structures and their resulting dynamical differences, we can understand the contribution of sequence-driven dynamical changes in mutants versus changes that arise from e.g. experimental processing variability (i.e. model artifacts). To do this, we perform a similar analysis outlined in the previous section with mutant structures and their controls. If these fall below the best fit line then it is likely that the resulting NMA dynamical differences are driven by experimental processing differences and not sequence. However, if data points fall above the best fit line then it is likely that the differences in NMA deformation profiles, as measured by the standard deviation of deformation difference, is due to the structural differences that arise from changes in protein sequence. Using the linear regression model, we calculate the percent difference between the true mutant standard deviation values with the predicted points on the best fit line and the 95% prediction interval ceiling (**SI Figure 3**). We see that all mutant standard deviation values fall at least 30% above the best fit values for the same RBD alignment and fall at least 2% above the prediction interval ceiling. This suggests that all of the results that we see from comparing the dynamics of mutant proteins and their controls (see **Section 3.4**) are due to the structural consequences of protein sequence.

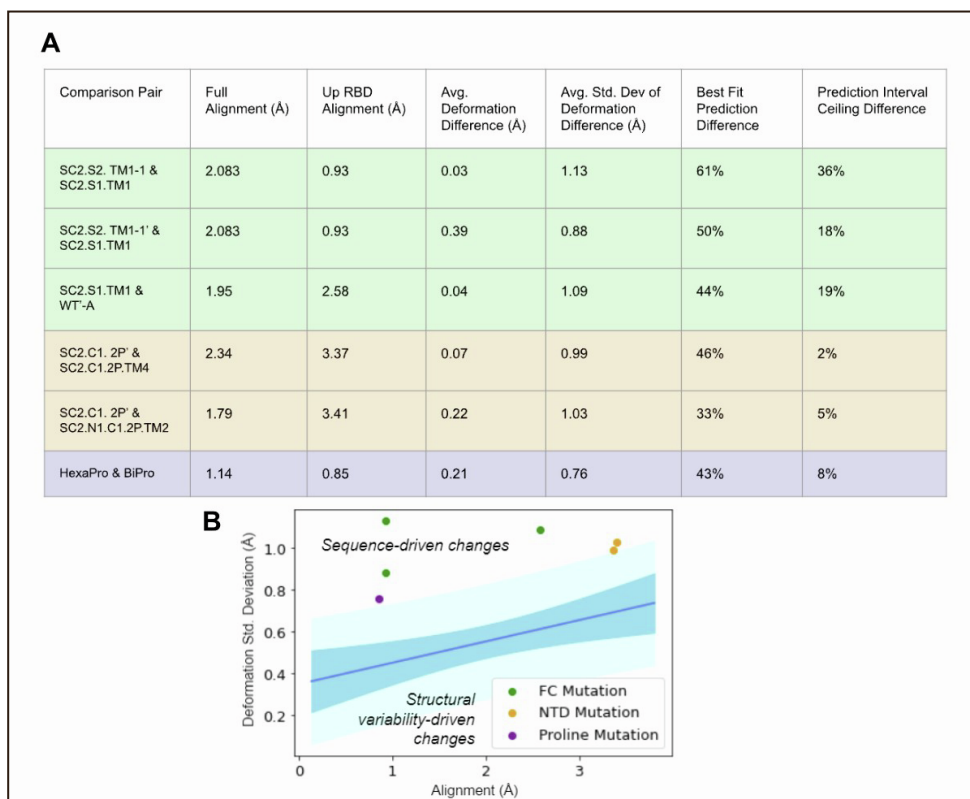

**SI Figure 3:** Mutant comparisons made to understand contribution of sequence to dynamic variability. **(A)** Full results are listed and **(B)** the standard deviation of the difference between the deformation curves is plotted against RBD structural alignment in reference to the linear regression model from **SI Figure 2-B**. Proteins that are used to study each group of mutations are highlighted in different colors. **Green** represents furin cleavage mutations, **orange** represents NTD mutations, and **purple** represents proline mutations. All proteins comparisons made for the mutant proteins fall well above the best fit line and 95% intervals, see best fit and prediction interval differences **(A)**, indicating that dynamical differences between mutant and control proteins are driven by sequence.

### iii. Molecular dynamics simulation of WT structure

#### a. Simulation Methods

A 100 ns classical molecular dynamics (MD) simulation was performed on the atomistic WT S protein structure resolved by Amaro et al (44). The Amaro structure is missing the first 13 residues, and these were included in the starting structure by way of homology modeling using the Robetta web server (2). The full sequence was modeled using each chain of the WT MD model as a template. Next, the resulting homology chains were aligned with the WT model, and the 13 residues of the homology model were attached to each chain of the WT model. The resulting RBD-up model, termed WT'-B, is used as the input structure for simulation. The MD simulation was carried out using the GROMACS 2019 version MD software (49) and performed on the TACC Stampede2 HPC platform.

We used the CHARMM36m forcefield, which is uniquely suited for flexible proteins and other biomolecular structure (55). For all runs, the protein was simulated in a neutral cubic water box of size  $45^3$  nm<sup>3</sup> using periodic boundary conditions. Prior to the final production run, an energy minimization, NVT equilibration, and NPT equilibration runs were performed. The energy minimization run was conducted using the steepest descent algorithm. The NVT and NPT equilibration runs were both simulated for 100 ps each. During the NVT run, the protein and environment were equilibrated at 300 K using the V-Rescale

thermostat—Berendsen thermostat with velocity rescaling—for temperature coupling (50). Next, during the NPT run, the system was equilibrated at 1 atm using Parrinello-Rahman barostat for pressure coupling (51). The final MD production was run for a time length of 100 ns at 300 K using a 2 femtosecond time step and the same thermostat and barostat that were employed for the equilibration runs. The Particle Mesh Edwald (PME) algorithm (52) is used for long range electrostatics (grid spacing at 1.6) and Verlet (53) algorithm for neighbor searching (short range cutoffs at 1.0). The LINCS algorithm (54) was used to constrain hydrogen and covalent bonds that are explicitly stated in the protein topology.

### **b. WT Simulation and ANM Results**

We explore different configurations of the WT structure in simulation to confirm if different snapshots from an MD trajectory may impact predicted ANM dynamics. We chose 2 frames from the WT'-B simulation, one in which the up RBD is rotated outward compared to the starting structure and one where the RBD is rotated inward—frames 2400 and 152 respectively. These specific structures were chosen due to the RBD orientation and because they exhibit high RMSD measurements (indicating lower structural alignment). We conduct the same analysis as above and the results are compared to the case study model in **SI Figure 2B**. The alignment analysis was conducted three separate times on (1) the full length protein, (2) protein with the commonly unresolved C-terminus tail removed, and (3) protein with additional commonly unresolved regions removed, to make parallels to the results presented in **Figure 2**. Each data point is the result of one of the more rotated RBD structures taken from the WT'-B simulation trajectory compared to the baseline (Amaro et al. ) structure, resulting in 6 total data points. The results for the WT'-B analysis are summarized in **SI Figure 4**. In **SI Figure 4-B**, we see that the majority of points fall below the best fit line, consistent with the fact that structural differences drive dynamical changes rather than a change in sequence. There are 2 points resulting from the proteins with regions removed that fall above the best fit line. However, these fall within the expected range of data variability (95% confidence interval) meaning that the reflected NMA dynamics of the MD snapshots correspond well enough to that of the baseline structure. Overall, these results indicate that reliable results are obtained when using the Amaro WT structure, used in all primary WT analysis, given that it is able to capture the dynamics presented in structurally heterogeneous MD snapshots.



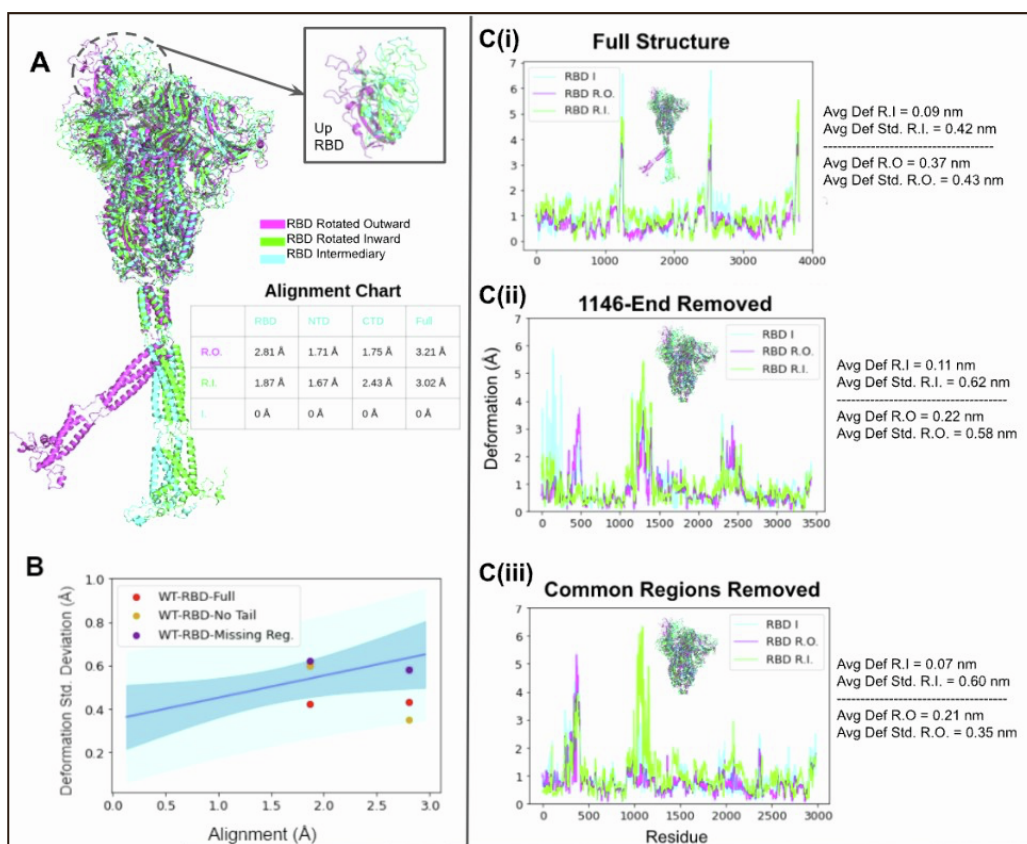

**SI Figure 4:** Visualization of WT'-B MD snapshots as compared to the baseline WT structure (A). The results of the WT alignment analysis are plotted in reference to the linear regression model that is shown in SI Figure 2-B (B). The deformation curves and their resulting alignment measurements are listed (C) for the full structure (i) structure with tail removed (ii) and structure with additional regions removed (iii). These results show that the WT model used in our main analysis is able to capture the dynamic variability that may come from using an alternative MD model.

## 10. Supplementary Videos

Videos S1-S20 show the NMA trajectory and dynamic domain results for each analyzed spike protein. Table S4 shows the PDB ID of the protein corresponding to each video.

| Video ID | Protein PDB ID |
|----------|----------------|
| S1       | 5W9K           |
| S2       | 6NB6           |
| S3       | 6VSB           |
| S4       | 6VYB           |
| S5       | 6X2B           |
| S6       | 6X2C           |
| S7       | 6XF6           |
| S8       | 6XKL           |
| S9       | 6XM0           |
| S10      | 6XR8           |
| S11      | 6ZGG           |
| S12      | 6ZP7           |
| S13      | 7AD1           |

|     |      |
|-----|------|
| S14 | 7BYR |
| S15 | 7C2L |
| S16 | 7CN9 |
| S17 | 7JW0 |
| S18 | 7K4N |
| S19 | 7K43 |
| S20 | 7KDH |

## References

1. Wu, F., S. Zhao, B. Yu, Y.-M. Chen, W. Wang, Z.-G. Song, Y. Hu, Z.-W. Tao, J.-H. Tian, Y.-Y. Pei, M.-L. Yuan, Y.-L. Zhang, F.-H. Dai, Y. Liu, Q.-M. Wang, J.-J. Zheng, L. Xu, E.C. Holmes, and Y.-Z. Zhang. 2020. A new coronavirus associated with human respiratory disease in China. *Nature*. 579:265–269.
2. Wrapp, D., N. Wang, K.S. Corbett, J.A. Goldsmith, C.-L. Hsieh, O. Abiona, B.S. Graham, and J.S. McLellan. 2020. Cryo-EM structure of the 2019-nCoV spike in the prefusion conformation. *Science*. 367:1260–1263.
3. Hsieh, C.-L., J.A. Goldsmith, J.M. Schaub, A.M. DiVenere, H.-C. Kuo, K. Javanmardi, K.C. Le, D. Wrapp, A.G.-W. Lee, Y. Liu, C.-W. Chou, P.O. Byrne, C.K. Hjorth, N.V. Johnson, J. Ludes-Meyers, A.W. Nguyen, J. Park, N. Wang, D. Amengor, J.A. Maynard, I.J. Finkelstein, and J.S. McLellan. 2020. Structure-based Design of Prefusion-stabilized SARS-CoV-2 Spikes. *bioRxiv*. 2020.05.30.125484.
4. Huo, J., Y. Zhao, J. Ren, D. Zhou, H.M.E. Duyvesteyn, H.M. Ginn, L. Carrique, T. Malinauskas, R.R. Ruza, P.N.M. Shah, T.K. Tan, P. Rijal, N. Coombes, K.R. Bewley, J.A. Tree, J. Radecke, N.G. Paterson, P.P. Supasa, J. Mongkolsapaya, G.R. Screaton, M. Carroll, A. Townsend, E.E. Fry, R.J. Owens, and D.I. Stuart. 2020. Neutralization of SARS-CoV-2 by Destruction of the Prefusion Spike. *Cell Host & Microbe*.
5. Walls, A.C., Y.-J. Park, M.A. Tortorici, A. Wall, A.T. McGuire, and D. Veasley. 2020. Structure, Function, and Antigenicity of the SARS-CoV-2 Spike Glycoprotein. *Cell*. 181:281–292.e6.
6. Wrobel, A.G., D.J. Benton, P. Xu, C. Roustan, S.R. Martin, P.B. Rosenthal, J.J. Skehel, and S.J. Gamblin. 2020. SARS-CoV-2 and bat RaTG13 spike glycoprotein structures inform on virus evolution and furin-cleavage effects. *Nature Structural & Molecular Biology*. 27:763–767.
7. Bank, R.P.D. RCSB PDB - 6XF6: Cryo-EM structure of a biotinylated SARS-CoV-2 spike probe in the prefusion state (1 RBD up). .
8. Juraszek, J., L. Rutten, S. Blokland, P. Bouchier, R. Voorzaat, T. Ritschel, M.J.G. Bakkers, L.L.R. Renault, and J.P.M. Langedijk. 2020. Stabilizing the Closed SARS-CoV-2 Spike Trimer. *bioRxiv*. 2020.07.10.197814.
9. Henderson, R., R.J. Edwards, K. Mansouri, K. Janowska, V. Stalls, S.M.C. Gobeil, M. Kopp, D. Li, R. Parks, A.L. Hsu, M.J. Borgnia, B.F. Haynes, and P. Acharya. 2020. Controlling the SARS-CoV-2 spike glycoprotein conformation. *Nature Structural & Molecular Biology*. 27:925–933.
10. A Carbohydrate-Binding Protein from the Edible Lablab Beans Effectively Blocks the Infections of Influenza Viruses and SARS-CoV-2: Cell Reports. .
11. Zhou, D., H.M.E. Duyvesteyn, C.-P. Chen, C.-G. Huang, T.-H. Chen, S.-R. Shih, Y.-C. Lin, C.-Y. Cheng, S.-H. Cheng, Y.-C. Huang, T.-Y. Lin, C. Ma, J. Huo, L. Carrique, T. Malinauskas, R.R. Ruza, P.N.M. Shah, T.K. Tan, P. Rijal, R.F. Donat, K. Godwin, K.R. Buttigieg, J.A. Tree, J. Radecke, N.G. Paterson, P. Supasa, J. Mongkolsapaya, G.R. Screaton, M.W. Carroll, J. Gilbert-Jaramillo, M.L. Knight, W. James, R.J. Owens, J.H. Naismith, A.R. Townsend, E.E. Fry, Y. Zhao, J. Ren, D.I. Stuart, and K.-Y.A. Huang. 2020. Structural basis for the neutralization of SARS-CoV-2 by an antibody from a convalescent patient. *Nature Structural & Molecular Biology*. 27:950–958.
12. Cai, Y., J. Zhang, T. Xiao, H. Peng, S.M. Sterling, R.M. Walsh, S. Rawson, S. Rits-Volloch, and B. Chen. 2020. Distinct conformational states of SARS-CoV-2 spike protein. *Science*. 369:1586–1592.
13. Gobeil, S.M.-C., K. Janowska, S. McDowell, K. Mansouri, R. Parks, K. Manne, V. Stalls, M. Kopp, R. Henderson, R.J. Edwards, B.F. Haynes, and P. Acharya. 2020. D614G mutation alters SARS-CoV-2 spike conformational dynamics and protease cleavage susceptibility at the S1/S2 junction. *bioRxiv*. 2020.10.11.335299.
14. Melero, R., C.O.S. Sorzano, B. Foster, J.-L. Vilas, M. Martínez, R. Marabini, E. Ramírez-Aportela, R. Sanchez-Garcia, D. Herreros, L. del Caño, P. Losana, Y.C. Fonseca-Reyna, P. Conesa, D. Wrapp, P. Chacon, J.S. McLellan, H.D. Tagare, and J.-M. Carazo. 2020. Continuous flexibility analysis of SARS-CoV-2 Spike prefusion structures. *bioRxiv*. 2020.07.08.191072.

15. Rota, P.A., M.S. Oberste, S.S. Monroe, W.A. Nix, R. Campagnoli, J.P. Icenogle, S. Peñaranda, B. Bankamp, K. Maher, M. Chen, S. Tong, A. Tamin, L. Lowe, M. Frace, J.L. DeRisi, Q. Chen, D. Wang, D.D. Erdman, T.C.T. Peret, C. Burns, T.G. Ksiazek, P.E. Rollin, A. Sanchez, S. Liffick, B. Holloway, J. Limor, K. McCaustland, M. Olsen-Rasmussen, R. Fouchier, S. Günther, A.D.M.E. Osterhaus, C. Drosten, M.A. Pallansch, L.J. Anderson, and W.J. Bellini. 2003. Characterization of a Novel Coronavirus Associated with Severe Acute Respiratory Syndrome. *Science*. 300:1394–1399.
16. Bermingham, A., M.A. Chand, C.S. Brown, E. Aarons, C. Tong, C. Langrish, K. Hoschler, K. Brown, M. Galiano, R. Myers, R.G. Pebody, H.K. Green, N.L. Boddington, R. Gopal, N. Price, W. Newsholme, C. Drosten, R.A. Fouchier, and M. Zambon. 2012. Severe respiratory illness caused by a novel coronavirus, in a patient transferred to the United Kingdom from the Middle East, September 2012. *Euro Surveill*. 17:20290.
17. Wu, N.C., M. Yuan, H. Liu, C.-C.D. Lee, X. Zhu, S. Bangaru, J.L. Torres, T.G. Caniels, P.J.M. Brouwer, M.J. van Gils, R.W. Sanders, A.B. Ward, and I.A. Wilson. 2020. An alternative binding mode of IGHV3-53 antibodies to the SARS-CoV-2 receptor binding domain. *bioRxiv*. 2020.07.26.222232.
18. Liu, L., P. Wang, M.S. Nair, J. Yu, M. Rapp, Q. Wang, Y. Luo, J.F.-W. Chan, V. Sahi, A. Figueroa, X.V. Guo, G. Cerutti, J. Bimela, J. Gorman, T. Zhou, Z. Chen, K.-Y. Yuen, P.D. Kwong, J.G. Sodroski, M.T. Yin, Z. Sheng, Y. Huang, L. Shapiro, and D.D. Ho. 2020. Potent neutralizing antibodies against multiple epitopes on SARS-CoV-2 spike. *Nature*. 584:450–456.
19. Yuan, M., H. Liu, N.C. Wu, C.-C.D. Lee, X. Zhu, F. Zhao, D. Huang, W. Yu, Y. Hua, H. Tien, T.F. Rogers, E. Landais, D. Sok, J.G. Jardine, D.R. Burton, and I.A. Wilson. 2020. Structural basis of a shared antibody response to SARS-CoV-2. *Science*. 369:1119–1123.
20. Cao, Y., B. Su, X. Guo, W. Sun, Y. Deng, L. Bao, Q. Zhu, X. Zhang, Y. Zheng, C. Geng, X. Chai, R. He, X. Li, Q. Lv, H. Zhu, W. Deng, Y. Xu, Y. Wang, L. Qiao, Y. Tan, L. Song, G. Wang, X. Du, N. Gao, J. Liu, J. Xiao, X. Su, Z. Du, Y. Feng, C. Qin, C. Qin, R. Jin, and X.S. Xie. 2020. Potent Neutralizing Antibodies against SARS-CoV-2 Identified by High-Throughput Single-Cell Sequencing of Convalescent Patients' B Cells. *Cell*. 182:73-84.e16.
21. Barnes, C.O., C.A. Jette, M.E. Abernathy, K.-M.A. Dam, S.R. Esswein, H.B. Gristick, A.G. Malyutin, N.G. Sharaf, K.E. Huey-Tubman, Y.E. Lee, D.F. Robbiani, M.C. Nussenzweig, A.P. West, and P.J. Bjorkman. 2020. SARS-CoV-2 neutralizing antibody structures inform therapeutic strategies. *Nature*. 1–9.
- 22.. Du, S., Y. Cao, Q. Zhu, P. Yu, F. Qi, G. Wang, X. Du, L. Bao, W. Deng, H. Zhu, J. Liu, J. Nie, Y. Zheng, H. Liang, R. Liu, S. Gong, H. Xu, A. Yisimayi, Q. Lv, B. Wang, R. He, Y. Han, W. Zhao, Y. Bai, Y. Qu, X. Gao, C. Ji, Q. Wang, N. Gao, W. Huang, Y. Wang, X.S. Xie, X. Su, J. Xiao, and C. Qin. 2020. Structurally Resolved SARS-CoV-2 Antibody Shows High Efficacy in Severely Infected Hamsters and Provides a Potent Cocktail Pairing Strategy. *Cell*. 183:1013-1023.e13.
23. Hansen, J., A. Baum, K.E. Pascal, V. Russo, S. Giordano, E. Wloga, B.O. Fulton, Y. Yan, K. Koon, K. Patel, K.M. Chung, A. Hermann, E. Ullman, J. Cruz, A. Rafique, T. Huang, J. Fairhurst, C. Libertiny, M. Malbec, W. Lee, R. Welsh, G. Farr, S. Pennington, D. Deshpande, J. Cheng, A. Watty, P. Bouffard, R. Babb, N. Levenkova, C. Chen, B. Zhang, A.R. Hernandez, K. Saotome, Y. Zhou, M. Franklin, S. Sivapalasingam, D.C. Lye, S. Weston, J. Logue, R. Haupt, M. Frieman, G. Chen, W. Olson, A.J. Murphy, N. Stahl, G.D. Yancopoulos, and C.A. Kyratsous. 2020. Studies in humanized mice and convalescent humans yield a SARS-CoV-2 antibody cocktail. *Science*. 369:1010–1014.
24. Lv, Z., Y.-Q. Deng, Q. Ye, L. Cao, C.-Y. Sun, C. Fan, W. Huang, S. Sun, Y. Sun, L. Zhu, Q. Chen, N. Wang, J. Nie, Z. Cui, D. Zhu, N. Shaw, X.-F. Li, Q. Li, L. Xie, Y. Wang, Z. Rao, C.-F. Qin, and X. Wang. 2020. Structural basis for neutralization of SARS-CoV-2 and SARS-CoV by a potent therapeutic antibody. *Science*. 369:1505–1509.
25. Bank, R.P.D. RCSB PDB - 6ZHD: H11-H4 bound to Spike. .
26. Tortorici, M.A., M. Beltramello, F.A. Lempp, D. Pinto, H.V. Dang, L.E. Rosen, M. McCallum, J. Bowen, A. Minola, S. Jaconi, F. Zatta, A. De Marco, B. Guarino, S. Bianchi, E.J. Lauron, H. Tucker, J. Zhou, A. Peter, C. Havenar-Daughton, J.A. Wojcechowskyj, J.B. Case, R.E. Chen, H. Kaiser, M. Montiel-Ruiz, M. Meury, N. Czudnochowski, R. Spreafico, J. Dillen, C. Ng, N. Sprugasci, K. Culap, F. Benigni, R.

- Abdelnabi, S.-Y.C. Foo, M.A. Schmid, E. Cameroni, A. Riva, A. Gabrieli, M. Galli, M.S. Pizzuto, J. Neyts, M.S. Diamond, H.W. Virgin, G. Snell, D. Corti, K. Fink, and D. Veessler. 2020. Ultrapotent human antibodies protect against SARS-CoV-2 challenge via multiple mechanisms. *Science*. 370:950–957.
27. Chi, X., R. Yan, J. Zhang, G. Zhang, Y. Zhang, M. Hao, Z. Zhang, P. Fan, Y. Dong, Y. Yang, Z. Chen, Y. Guo, J. Zhang, Y. Li, X. Song, Y. Chen, L. Xia, L. Fu, L. Hou, J. Xu, C. Yu, J. Li, Q. Zhou, and W. Chen. 2020. A neutralizing human antibody binds to the N-terminal domain of the Spike protein of SARS-CoV-2. *Science*. 369:650–655.
  28. Hurlburt, N.K., Y.-H. Wan, A.B. Stuart, J. Feng, A.T. McGuire, L. Stamatatos, and M. Pancera. 2020. Structural basis for potent neutralization of SARS-CoV-2 and role of antibody affinity maturation. *bioRxiv*. 2020.06.12.148692.
  29. A Therapeutic Non-self-reactive SARS-CoV-2 Antibody Protects from Lung Pathology in a COVID-19 Hamster Model: Cell. .
  30. Bank, R.P.D. RCSB PDB - 7C8W: Structure of sybody MR17 in complex with the SARS-CoV-2 S receptor-binding domain (RBD). .
  31. Ju, B., Q. Zhang, J. Ge, R. Wang, J. Sun, X. Ge, J. Yu, B. Zhou, S. Song, X. Tang, J. Yu, J. Lan, J. Yuan, H. Wang, J. Zhao, S. Zhang, Y. Wang, X. Shi, and L. Zhang. 2020. Human neutralizing antibodies elicited by SARS-CoV-2 infection. *Nature*. 584:1–8.
  32. Pinto, D., Y.-J. Park, M. Beltramello, A.C. Walls, M.A. Tortorici, S. Bianchi, S. Jaconi, K. Culap, F. Zatta, A.D. Marco, A. Peter, B. Guarino, R. Spreafico, E. Cameroni, J.B. Case, R.E. Chen, C. Havenar-Daughton, G. Snell, A. Telenti, H.W. Virgin, A. Lanzavecchia, M.S. Diamond, K. Fink, D. Veessler, and D. Corti. 2020. Structural and functional analysis of a potent sarbecovirus neutralizing antibody. *bioRxiv*. 2020.04.07.023903.
  33. Piccoli, L., Y.-J. Park, M.A. Tortorici, N. Czudnochowski, A.C. Walls, M. Beltramello, C. Silacci-Fregni, D. Pinto, L.E. Rosen, J.E. Bowen, O.J. Acton, S. Jaconi, B. Guarino, A. Minola, F. Zatta, N. Sprugasci, J. Bassi, A. Peter, A.D. Marco, J.C. Nix, F. Mele, S. Jovic, B.F. Rodriguez, S.V. Gupta, F. Jin, G. Piumatti, G.L. Presti, A.F. Pellanda, M. Biggiogero, M. Tarkowski, M.S. Pizzuto, E. Cameroni, C. Havenar-Daughton, M. Smithy, D. Hong, V. Lepori, E. Albanese, A. Ceschi, E. Bernasconi, L. Elzi, P. Ferrari, C. Garzoni, A. Riva, G. Snell, F. Sallusto, K. Fink, H.W. Virgin, A. Lanzavecchia, D. Corti, and D. Veessler. 2020. Mapping Neutralizing and Immunodominant Sites on the SARS-CoV-2 Spike Receptor-Binding Domain by Structure-Guided High-Resolution Serology. *Cell*. 0.
  34. Custódio, T.F., H. Das, D.J. Sheward, L. Hanke, S. Pazicky, J. Pieprzyk, M. Sorgenfrei, M.A. Schroer, A.Y. Gruzinov, C.M. Jeffries, M.A. Graewert, D.I. Svergun, N. Dobrev, K. Remans, M.A. Seeger, G.M. McInerney, B. Murrell, B.M. Hällberg, and C. Löw. 2020. Selection, biophysical and structural analysis of synthetic nanobodies that effectively neutralize SARS-CoV-2. *Nature Communications*. 11:5588.
  35. Song, W., M. Gui, X. Wang, and Y. Xiang. 2018. Cryo-EM structure of the SARS coronavirus spike glycoprotein in complex with its host cell receptor ACE2. *PLOS Pathogens*. 14:e1007236.
  36. Yuan, Y., D. Cao, Y. Zhang, J. Ma, J. Qi, Q. Wang, G. Lu, Y. Wu, J. Yan, Y. Shi, X. Zhang, and G.F. Gao. 2017. Cryo-EM structures of MERS-CoV and SARS-CoV spike glycoproteins reveal the dynamic receptor binding domains. *Nature Communications*. 8:15092.
  37. McLellan, J.S., M. Chen, M.G. Joyce, M. Sastry, G.B.E. Stewart-Jones, Y. Yang, B. Zhang, L. Chen, S. Srivatsan, A. Zheng, T. Zhou, K.W. Graepel, A. Kumar, S. Moin, J.C. Boyington, G.Y. Chuang, C. Soto, U. Baxa, A.Q. Bakker, H. Spits, T. Beaumont, Z. Zheng, N. Xia, S.Y. Ko, J.P. Todd, S. Rao, B.S. Graham, and P.D. Kwong. 2013. Structure-based design of a fusion glycoprotein vaccine for respiratory syncytial virus. *Science*. 342:592–598.
  38. Chi, X., R. Yan, J. Zhang, G. Zhang, Y. Zhang, M. Hao, Z. Zhang, P. Fan, Y. Dong, Y. Yang, Z. Chen, Y. Guo, J. Zhang, Y. Li, X. Song, Y. Chen, L. Xia, L. Fu, L. Hou, J. Xu, C. Yu, J. Li, Q. Zhou, and W. Chen. 2020. A neutralizing human antibody binds to the N-terminal domain of the Spike protein of SARS-CoV-2. *Science*. 369:650–655.
  39. Walke, R.C., J.K. Longworth, R.H. Little, A. Venter, and B.W. Miller. 2004. The practical application of the AMBER software tool to support environmental decision making. *Multimedia Modeling*. 10.

40. Delgado, J., L.G. Radusky, D. Cianferoni, and L. Serrano. 2019. FoldX 5.0: working with RNA, small molecules and a new graphical interface. *Bioinformatics*. 35:4168–4169.
41. Gasteiger, E., C. Hoogland, A. Gattiker, S. Duvaud, M.R. Wilkins, R.D. Appel, and A. Bairoch. 2005. Protein Identification and Analysis Tools on the ExPASy Server. In: Walker JM, editor. *The Proteomics Protocols Handbook*. Totowa, NJ: Humana Press. pp. 571–607.
42. Kawashima, S., P. Pokarowski, M. Pokarowska, A. Kolinski, T. Katayama, and M. Kanehisa. 2008. AAindex: amino acid index database, progress report 2008. *Nucleic Acids Res*. 36:D202-205.
43. Cheng, J., A.Z. Randall, M.J. Sweredoski, and P. Baldi. 2005. SCRATCH: a protein structure and structural feature prediction server. *Nucleic Acids Res*. 33:W72-76.
44. L. Casalino *et al.*, Beyond Shielding: The Roles of Glycans in SARS-CoV-2 Spike Protein. *bioRxiv*, (2020).
45. *Protein structure prediction and analysis using the Robetta server | Nucleic Acids Research | Oxford Academic*.
46. T. Zhou *et al.*, Cryo-EM Structures Delineate a pH-Dependent Switch that Mediates Endosomal Positioning of SARS-CoV-2 Spike Receptor-Binding Domains. *bioRxiv*, 2020.2007.2004.187989 (2020).
47. S. M. C. Gobeil *et al.*, D614G mutation alters SARS-CoV-2 spike conformational dynamics and protease cleavage susceptibility at the S1/S2 junction. *bioRxiv*, 2020.2010.2011.335299 (2020).
48. M. C. Gobeil Sophie *et al.*, Effect of natural mutations of SARS-CoV-2 on spike structure, conformation, and antigenicity. *Science* **373**, eabi6226.
49. M. J. Abraham *et al.*, GROMACS: High performance molecular simulations through multi-level parallelism from laptops to supercomputers. *SoftwareX* **1-2**, 19-25 (2015).
50. G. Bussi, D. Donadio, M. Parrinello, Canonical sampling through velocity-rescaling. *The Journal of Chemical Physics* **126**, 014101 (2007).
51. R. Martonák, A. Laio, M. Parrinello, Predicting Crystal Structures: The Parrinello-Rahman Method Revisited. *Physical review letters* **90**, 075503 (2003).
52. Darden, T., D. York, and L. Pedersen. 1993. Particle mesh Ewald: AnN<sup>3</sup>log(N) method for Ewald sums in large systems. *The Journal of Chemical Physics*. 98(12):10089-10092, doi: 10.1063/1.464397, <https://dx.doi.org/10.1063/1.464397>.
53. Toxvaerd, S., O. J. Heilmann, and J. C. Dyre. 2012. Energy conservation in molecular dynamics simulations of classical systems. *The Journal of Chemical Physics*. 136(22):224106, doi: 10.1063/1.4726728, <https://dx.doi.org/10.1063/1.4726728>.
54. B. Hess, H. Bekker, H. J. C. Berendsen, J. G. E. M. Fraaije, LINCS: A linear constraint solver for molecular simulations. *Journal of Computational Chemistry* **18**, 1463-1472 (1997).
55. Huang, J., S. Rauscher, G. Nawrocki, T. Ran, M. Feig, B. L. de Groot, H. Grubmüller, and A. D. MacKerell. 2017. CHARMM36m: an improved force field for folded and intrinsically disordered proteins. *Nature Methods*. 14(1):71-73, doi: 10.1038/nmeth.4067, <https://www.nature.com/articles/nmeth.4067>
